# **FisB relies on homo-oligomerization and lipid-binding to catalyze membrane fission in bacteria**

**Ane Landajuela<sup>1,2†\*</sup>, Martha Braun<sup>2,3†</sup>, Christopher D. A. Rodrigues<sup>4</sup>, Alejandro Martínez-Calvo<sup>5</sup>, Thierry Doan<sup>6</sup>, Florian Horenkamp<sup>7#</sup>, Anna Andronicos<sup>1‡</sup>, Vladimir Shteyn<sup>1,2</sup>, Nathan D. Williams<sup>2,7</sup>, Chenxiang Lin<sup>2,7</sup>, Ned S. Wingreen<sup>8,9</sup>, David Z. Rudner<sup>10</sup>, Erdem Karatekin<sup>1,2,3,11\*</sup>**

1 Cellular and Molecular Physiology, Yale University, New Haven, CT, USA

2 Nanobiology Institute, Yale University, West Haven, CT, USA

3 Molecular Biophysics and Biochemistry, Yale University, New Haven, CT, USA

4 iThree Institute, University of Technology Sydney (UTS), Australia

5 Grupo de Mecánica de Fluidos, Universidad Carlos III de Madrid, Spain

6 Laboratoire d'Ingénierie des Systèmes Macromoléculaires, Aix-Marseille Université - CNRS UMR7255, Marseilles, France

7 Cell Biology, Yale University

8 Department of Molecular Biology, Princeton University, Princeton, NJ 08544, USA.

9 Lewis-Sigler Institute for Integrative Genomics, Princeton University, Princeton, NJ 08544, USA.

10 Department of Microbiology, Harvard Medical School, Boston MA

11 Université de Paris, SPPIN - Saints-Pères Paris Institute for the Neurosciences, Centre National de la Recherche Scientifique (CNRS), F-75006 Paris, France.

† These authors contributed equally

# Present address: Pfizer, New London, CT

‡ Present address: Department of Biological Chemistry, School of Medicine, U. California Irvine

\* To whom correspondence should be addressed

ane.landajuela@yale.edu

erdem.karatekin@yale.edu (lead contact)

### 33 **ABSTRACT**

34 Little is known about mechanisms of membrane fission in bacteria despite their  
35 requirement for cytokinesis. The only known dedicated membrane fission machinery in  
36 bacteria, FisB, is expressed during sporulation in *Bacillus subtilis* and is required to  
37 release the developing spore into the mother cell cytoplasm. Here we characterized the  
38 requirements for FisB-mediated membrane fission. FisB forms mobile clusters of ~12  
39 molecules that give way to an immobile cluster at the engulfment pole containing ~40  
40 proteins at the time of membrane fission. Analysis of FisB mutants revealed that binding  
41 to acidic lipids and homo-oligomerization are both critical for targeting FisB to the  
42 engulfment pole and membrane fission. Experiments using artificial membranes and  
43 filamentous cells suggest FisB does not have an intrinsic ability to sense or induce  
44 membrane curvature but can bridge membranes. Finally, modeling suggests homo-  
45 oligomerization and trans interactions with membranes are sufficient to explain FisB  
46 accumulation at the membrane neck that connects the engulfment membrane to the  
47 rest of the mother cell membrane during late stages of engulfment. Together, our results  
48 show that FisB is a robust and unusual membrane fission protein that relies on homo-  
49 oligomerization, lipid-binding and the unique membrane topology generated during  
50 engulfment for localization and membrane scission, but surprisingly, not on lipid  
51 microdomains, negative-curvature lipids, or curvature-sensing.

## 52 INTRODUCTION

53 Membrane fission is a fundamental process required for endocytosis<sup>1</sup>, membrane  
54 trafficking<sup>2</sup>, enveloped virus budding<sup>3</sup>, phagocytosis<sup>4</sup>, cell division<sup>5</sup> and sporulation<sup>6-8</sup>.  
55 During membrane fission, an initially continuous membrane divides into two separate  
56 ones. This process requires dynamic localization of specialized proteins, which  
57 generate the work required to merge membranes<sup>9-13</sup>. Dynamin<sup>14</sup> and the endosomal  
58 sorting complex required for transport III (ESCRT-III) catalyze many eukaryotic  
59 membrane fission reactions<sup>15</sup>. Both fission machineries bind acidic lipids, assemble into  
60 oligomers, and use hydrolysis of a nucleoside triphosphate (GTP or ATP) to achieve  
61 membrane fission. However, membrane fission can also be achieved by friction<sup>16</sup>,  
62 stress accumulated at a boundary between lipid domains<sup>17</sup>, forces generated by the  
63 acto-myosin network<sup>18-21</sup> or protein crowding<sup>22</sup>. By contrast, very little is known about  
64 membrane fission in bacteria, even though they rely on membrane fission for every  
65 division cycle.

66 We previously found that fission protein B (FisB) is required for the final membrane  
67 fission event during sporulation in *B. subtilis*<sup>23</sup>. When nutrients are scarce, bacteria in  
68 the orders *Bacillales* and *Clostridiales* initiate a developmental program that results in  
69 the production of highly resistant endospores<sup>24</sup>. Sporulation starts with an asymmetric  
70 cell division that generates a larger mother cell and a smaller forespore (Figure 1A). The  
71 mother cell membranes then engulf the forespore in a process similar to phagocytosis.  
72 At the end of engulfment, the leading membrane edge forms a small pore. Fission of  
73 this membrane neck connecting the engulfment membrane to the rest of the mother cell  
74 membrane releases the forespore, now surrounded by two membranes, into the mother  
75 cell cytoplasm (Figure 1A,B). At this late stage the mother nurtures the forespore as it  
76 prepares for dormancy. Once mature, the mother cell releases the spore into the  
77 environment through lysis. Spores can withstand heat, radiation, drought, antibiotics,  
78 and other environmental assaults for many years<sup>25-28</sup>. Under favorable conditions, the  
79 spore will germinate and restart the vegetative life cycle.

80 Conserved among endospore-forming bacteria, FisB is a mother-cell transmembrane  
81 protein expressed under the control of the transcription factor,  $\sigma^E$ , after asymmetric  
82 division<sup>29</sup>. In sporulating cells lacking FisB, engulfment proceeds normally but the final  
83 membrane fission event, detected using a lipophilic dye, is impaired<sup>23</sup> (Figure 1C,F and  
84 S1 Appendix Fig. 1A). During engulfment, FisB fused to a fluorescent protein forms dim,  
85 mobile clusters in the engulfment membrane (Figure 1D,E, Movie 1). When the  
86 engulfing membranes reach the cell pole, approximately 3 hours ( $t = 3h$ ) after the onset  
87 of sporulation, a cluster of FisB molecules accumulates at the pole forming a more  
88 intense, immobile focus, where and when fission occurs (Figure 1D,E, Movie 2).

89 We had previously reported<sup>23</sup> that FisB interacts with cardiolipin (CL), a lipid enriched at  
90 cell poles<sup>30-32</sup> whose levels increase during sporulation<sup>33</sup> and is implicated in membrane  
91 fusion<sup>34-36</sup> and fission reactions<sup>37</sup>. In addition, CL was reported to act as a landmark for  
92 the polar recruitment of the proline transporter ProP, and the mechanosensitive channel  
93 MscSm<sup>38,39</sup>. Thus, it seemed plausible that CL could act as a landmark to recruit FisB to  
94 the membrane fission site and facilitate membrane fission. Apart from this hypothesis,  
95 no information has been available about how FisB localizes to the membrane fission  
96 site and how it may drive membrane scission.

97 Here, we determined the requirements for FisB's sub-cellular localization and  
98 membrane fission during sporulation. Using quantitative analysis, we find small clusters  
99 of ~12 FisB molecules diffuse around the mother cell membrane and ~40 copies of FisB  
100 accumulate at the fission site as an immobile cluster to mediate membrane fission.  
101 When FisB expression was lowered, ~6 copies of FisB were sufficient to drive  
102 membrane fission, but fission took longer. Unexpectedly, FisB dynamics and membrane  
103 fission are independent of both CL and phosphatidylethanolamine (PE), another lipid  
104 implicated in membrane fusion and fission. We found FisB binds phosphatidylglycerol  
105 (PG) with comparable affinity as CL, after adjusting for charge density. Thus, we  
106 suspect that, as a more abundant lipid in the cell, PG can substitute for CL to bind FisB.  
107 We tested other factors that may be important for the sub-cellular localization of FisB  
108 and membrane fission. We found FisB dynamics are independent of flotillins, which  
109 organize bacterial membranes into functional membrane microdomains<sup>40</sup>, cell wall  
110 synthesis machinery, and proton or voltage gradients across the membrane. Using  
111 mutagenesis, we show that both FisB oligomerization and binding to acidic lipids are  
112 required for proper localization and membrane fission. *B. subtilis*  $\Delta$ *fisB* cells were  
113 partially complemented by *C. perfringens* FisB, despite only ~23% identity between the  
114 two proteins, suggesting a common localization and membrane fission mechanism  
115 based on a few conserved biophysical properties. The membrane neck that eventually  
116 undergoes fission and where FisB accumulates is the most highly curved membrane  
117 region in the late stages of engulfment. Thus, FisB could potentially localize at the  
118 membrane neck due to a preference for highly curved membrane regions. We tested  
119 this possibility in experiments with both artificial giant unilamellar vesicles (GUVs) and  
120 live cells. Surprisingly, these experiments failed to reveal any intrinsic affinity of FisB for  
121 highly curved membranes. However, we found that FisB bridges membranes and  
122 accumulates at membrane adhesion sites. Using modeling, we found that self-  
123 oligomerization of FisB, coupled with its ability to bridge negatively charged membranes  
124 is sufficient to explain its localization to the membrane neck. Thus, proteins can localize  
125 to highly curved membrane regions through mechanisms independent of intrinsic  
126 curvature sensitivity. Together, these results suggest FisB-FisB and FisB-lipid  
127 interactions, combined with the unique membrane topology generated at the engulfment  
128 pole during sporulation, provide a simple mechanism to recruit FisB to mediate  
129 membrane fission independent of other factors.

130

## 131 RESULTS

### 132 Membrane fission occurs in the presence of a cluster of FisB molecules

133 To correlate FisB dynamics with membrane fission, we devised a labeling strategy that  
134 allowed us to monitor both simultaneously, using a modified version of a fission assay  
135 developed previously<sup>41</sup>. In this assay, synchronous sporulation is induced by placing *B.*  
136 *subtilis* cells in a nutrient-poor medium. At different time points after the nutrient  
137 downshift, aliquots are harvested from the culture, stained with the lipophilic membrane  
138 dye FM4-64, mounted on an agar pad, and imaged using fluorescence microscopy. The  
139 dye is virtually non-fluorescent in the medium, and it cannot cross the cell membrane.  
140 Thus, before fission, FM4-64 labels the outer leaflet of both the mother cell and the  
141 forespore membranes. After fission, only the outer leaflet of the mother cell is labeled

142 (S1 Appendix Figure 1B). Because post-fission cells and cells that never entered  
143 sporulation are labeled identically, in addition to FM4-64, a fluorescent protein is  
144 expressed in the forespore under the control of the forespore-specific transcription  
145 factor  $\sigma^F$  to distinguish between the two cell types<sup>42</sup> (S1 Appendix Figure 1B). This  
146 makes it challenging to monitor FisB dynamics simultaneously, which requires a third  
147 channel. As an alternative, we used another lipophilic dye, TMA-DPH, that has partial  
148 access to internal membranes but can distinguish between pre- and post-fission stages  
149 without need for a forespore reporter<sup>23</sup> (Figure 1C and S1 Appendix Fig. 1D-G). Using  
150 TMA-DPH as the fission reporter, we quantified the percentage of cells that have  
151 undergone fission as a function of time, for wild-type, *fisB* knock-out ( $\Delta fisB$ , strain  
152 BDR1083, see S1 Appendix Table 2 for strains used), and  $\Delta fisB$  cells complemented  
153 with FisB fused to monomeric EGFP (mGFP-FisB, strain BAM003) as shown in Figure  
154 1D and 1F. These kinetic measurements reproduced results obtained using FM4-64 (S1  
155 Appendix Figure 1C). Thus, TMA-DPH can be used as a faithful reporter of membrane  
156 fission, leaving a second channel for monitoring dynamics of FisB fused to a fluorescent  
157 reporter.

158 In the experiments of Figure 1D and 1F, we simultaneously monitored dynamics of  
159 mGFP-FisB and membrane fission. We found that membrane fission is almost always  
160 accompanied by an intense, immobile mGFP-FisB signal at the engulfment pole (Figure  
161 1D, time= 3hr into sporulation). This intense spot at the engulfment pole (ISEP) is  
162 distinct from the dimmer, mobile clusters (DMC) that appear at earlier times elsewhere  
163 (Figure 1D). By 3 h into sporulation, around 70 % of the cells expressing mGFP-FisB at  
164 native levels had an ISEP (Figure 1G), a number that was close to the percentage of  
165 cells that had undergone fission by then (Figure 1F). Scoring individual cells, we found  
166 >90% (212/235) of cells that had undergone membrane fission also had an ISEP.

167 We also monitored membrane fission and mGFP-FisB signals in a strain with lower FisB  
168 expression. Here, lower FisB expression is achieved by reducing the spacing between  
169 the ribosome binding site (RBS) and the ATG start codon<sup>43</sup>. In this strain (BAL003),  
170 there was an initial delay in the fraction of cells that had undergone fission, but fission  
171 accelerated after t=3 h to reach near wild-type levels at around t=4h (Figure 1E,F). The  
172 fraction of cells with an ISEP followed a similar pattern (Figure 1G). The fraction of cells  
173 that had undergone fission at a given time was strongly correlated with the fraction of  
174 cells with an ISEP at that time (Figure 1H). Scoring individual cells, we found >93%  
175 (258/277) of cells that had undergone membrane fission had an ISEP. We conclude that  
176 membrane fission occurs in the presence of a large immobile cluster of FisB molecules  
177 at the site of fission.

178

### 179 **About 40 FisB molecules accumulate at the engulfment pole to mediate** 180 **membrane fission**

181 We asked how many copies of FisB are recruited to the engulfment pole at the time of  
182 membrane fission and how this number is affected by the expression level. For this  
183 quantification, we used DNA-origami based fluorescence standards we recently  
184 developed<sup>44</sup>. These standards consist of DNA rods (~410 nm long and 7 nm wide)  
185 labeled with AF647 at both ends and a controlled number of mEGFP molecules along

186 the rod (Figure 2A).

187 DNA-origami standards carrying different mEGFP copies were imaged using widefield  
188 fluorescence microscopy (Figure 2B). For each type of rod, the average total  
189 fluorescence intensity of single-rods was computed and plotted against the number of  
190 mEGFP molecules per rod, generating the calibration curve in Figure 2D. We generated  
191 *B. subtilis* cells expressing mEGFP-FisB at native levels (BAL001) in a  $\Delta fisB$   
192 background so that images of these cells obtained under identical imaging conditions as  
193 for the calibration curve in Figure 2D could be used to compute mEGFP-FisB copy  
194 numbers. We imaged mEGFP-FisB cells at  $t=3$  h after sporulation was induced. From  
195 these same images, we estimated the total fluorescence of dim, mobile clusters (DMC)  
196 and ISEP in *B. subtilis* cells as a sum of background-corrected pixel values (Figure 2C).  
197 Using the average values of these total intensities, we estimate  $\sim 40$  copies at the ISEP,  
198 and  $\sim 12$  per DMC from the calibration in Figure 2D. From the total intensity of cells (S1  
199 Appendix Fig. 2E), we also estimate there are  $\sim 1000$  FisB molecules per cell. Two  
200 independent estimates, based on *B. subtilis* calibration strains<sup>45</sup> and quantitative  
201 immunoblotting, resulted in slightly larger and smaller estimates of these copy numbers,  
202 respectively (S1 Appendix and S1 Appendix Figs. 2, 3).

203 We tracked the DMC to estimate how rapidly they move. From the tracks, we calculated  
204 the mean squared displacement (MSD) as a function of time (Figure 2E). The short-time  
205 diffusion coefficient estimated from the MSD is  $D_{DMC} \approx 2.8 \times 10^3 \text{ nm}^2/\text{s}$  (95%  
206 confidence interval  $CI=2.76 - 2.85 \times 10^3 \text{ nm}^2/\text{s}$ ). This value is comparable to the  
207 diffusivity of FloA and FloT clusters of  $\sim 100$  nm with  $D \approx 6.9 \times 10^3$  and  $4.1 \times 10^3 \text{ } \mu\text{m}^2/\text{s}$ ,  
208 respectively<sup>46</sup>. By comparison, ISEP have  $D_{ISEP} \approx 28 \text{ nm}^2/\text{s}$  ( $CI=22.9 - 33.1 \text{ nm}^2/\text{s}$ ), two  
209 orders of magnitude smaller.

210 We performed similar estimations of FisB copy numbers for the low expression strain  
211 (BAL004) (S1 Appendix Fig. 4). We found  $\sim 160 \pm 66$ ,  $122 \pm 51$ , or  $83 \pm 6$  ( $\pm SD$ ) copies per  
212 cell using *B. subtilis* standards, DNA-origami, or the quantitative WB methods,  
213 respectively. For the ISEP, we found  $8 \pm 2$ ,  $6 \pm 2$ , or  $5 \pm 3$  ( $\pm SD$ ) copies of mGFP-FisB  
214 using the three approaches, respectively (S1 Appendix Table 1). About 6 % of the total  
215 mGFP-FisB signal accumulated in ISEP, close to the  $\sim 4\%$  in the native-expression  
216 strain (S1 Appendix Fig. 4E). The DMC were too dim to quantify reliably. Assuming  
217 DMCs to be  $\sim 3$ -fold dimmer than ISEP like in the native-expression strain, each DMC  
218 would contain 2-3 mGFP-FisB, just below our detection limit. Interestingly, lowering the  
219 total expression of FisB per cell  $\sim 8$ -fold resulted in a  $\sim 6$ -fold reduction in the average  
220 number of FisB molecules found at the membrane fission site. Thus, only  $\sim 6$  copies of  
221 FisB are sufficient to mediate membrane fission, but only after some delay (Figure  
222 1E,F).

223 In summary,  $\sim 40$  FisB molecules accumulate at the fission site to mediate membrane  
224 fission. Only 3-4 DMCs need to reach the fission site to provide the necessary numbers.  
225 When FisB expression is lowered  $\sim 8$ -fold,  $\sim 6$  FisB molecules accumulate at the  
226 engulfment pole to mediate membrane fission, but fission takes longer.

227

228 **FisB localization and membrane fission are independent of cardiolipin,**  
229 **phosphatidylethanolamine and flotillins**

230 To investigate how FisB is recruited to the membrane fission site, we began by testing a  
231 potential role for the cell wall remodeling machinery, the protonmotive force, and the  
232 membrane potential, and found none influenced FisB dynamics (S1 Appendix Results  
233 and S1 Appendix Fig. 6).

234 We then tested whether lipid microdomains play a role in recruitment to the site of  
235 fission. Previously, we reported that the recombinant, purified extracytoplasmic domain  
236 (ECD, see Figure 4A) of FisB interacts with artificial lipid bilayers containing CL<sup>23</sup>. To  
237 test if FisB-CL interactions could be important for the subcellular localization of FisB and  
238 membrane fission, we generated a strain (BAM234) that carries deletions of the three  
239 known CL synthase genes *ywnE* (*clsA*), *ywjE* (*clsB*) and *ywiE* (*clsC*)<sup>47</sup> (Figure 3A). The  
240 CL synthase-deficient strain did not contain detectable levels of CL at t=3 hours after  
241 sporulation was initiated (Figure 3B). CL-deficient cells grew normally but had a  
242 reduction in sporulation efficiency as assayed by heat-resistant (20 min at 80°C) colony  
243 forming units (S1 Appendix Table 2 and S1 Appendix Figure 5)<sup>33</sup>. A reduction in  
244 sporulation efficiency measured in this manner can be due to a defect at one or several  
245 steps during sporulation or germination. Importantly, the membrane fission time course  
246 of  $\Delta$ *clsABC* cells was indistinguishable from those of wild-type cells (Figure 3C,D),  
247 indicating the defect in sporulation occurs at a stage after membrane fission. In addition,  
248 mYFP-FisB localization and dynamics were similar in  $\Delta$ *clsABC* (BAL037) and wild-type  
249 (BAL002) cells (Figure 3F-H). The fraction of cells that had an ISEP, and the intensity of  
250 the ISEP, reflecting the number of FisB molecules recruited to the membrane fission  
251 site, were indistinguishable for wild-type and  $\Delta$ *clsABC* cells (Figure 3G,H). We conclude  
252 that CL is not required for the subcellular localization of FisB or membrane fission.

253 Next, we tested a potential role for phosphatidylethanolamine (PE), another lipid  
254 implicated in membrane fusion and fission<sup>48,49</sup> and that forms microdomains<sup>50</sup>. We  
255 deleted the *pssA* gene which encodes phosphatidylserine synthase that mediates the  
256 first step in PE synthesis (Figure 3A) to generate cells lacking PE (strain BAL031,  
257 Figure 3B). Kinetics of membrane fission during sporulation were identical in  $\Delta$ *pssA* and  
258 wild-type cells (Figure 3D), indicating PE does not play a significant role in membrane  
259 fission.

260 PE and CL domains in *B. subtilis* membranes tend to occur in the same sub-cellular  
261 regions<sup>50</sup>, raising the possibility that CL and PE may compensate for each other. To test  
262 whether removing both CL and PE affects fission, we generated a quadruple mutant  
263 (BAL030) lacking both CL and PE (Figure 3B), leaving PG as the major phospholipid  
264 component of the membrane. Surprisingly, the quadruple mutant underwent fission with  
265 indistinguishable kinetics compared to wild-type (Figure 3C,D). Thus, two lipids with  
266 negative spontaneous curvature and implicated in membrane fusion and fission  
267 reactions in diverse contexts have no significant role in membrane fission mediated by  
268 FisB during sporulation.

269 In addition to CL and PE microdomains, bacteria also organize many signal  
270 transduction cascades and protein-protein interactions into functional membrane  
271 microdomains (FMMs), loose analogs of lipid rafts found in eukaryotic cells<sup>40</sup>. The  
272 FMMs of *B. subtilis* are enriched in polyisoprenoid lipids and contain flotillin-like  
273 proteins, FloT and FloA, that form mobile foci in the plasma membrane<sup>51,52</sup>. FloT-  
274 deficient cells have a sporulation defect, but which sporulation stage is impaired is not

275 known<sup>46</sup>. We observed that  $\Delta floA$  (BAL035), but not  $\Delta floT$  (BAL036), cells are impaired  
276 in sporulation as assayed by heat-resistant colony forming units (S1 Appendix Table 2,  
277 and S1 Appendix Figure 5). However, when we monitored engulfment and membrane  
278 fission, we found both proceeded normally in  $\Delta floA$  cells (Figure 3D). Thus, the  
279 sporulation defect in  $\Delta floA$  cells lies downstream of engulfment and membrane fission.  
280 This was confirmed by blocking formation of FMMs during sporulation by addition of 50  
281  $\mu\text{M}$  zaragozic acid<sup>53</sup> to the sporulation medium which had no effect on the localization of  
282 mGPF-FisB (Figure 3E).

283 Together, these results imply that FisB-mediated membrane fission that marks the end  
284 of engulfment during sporulation is insensitive to the negative-curvature lipids CL, PE,  
285 and to FloA/T-dependent lipid domains.

286

### 287 **FisB binds to acidic lipids**

288 PG can substitute for CL as a binding partner for many proteins<sup>54,55</sup>. To see if this might  
289 also be the case for the FisB ECD, we quantified the affinity of this domain for both  
290 lipids.

291 Most, but not all, algorithms (S1 Appendix Fig. 7) predict FisB to possess a single  
292 transmembrane domain (TMD) with a small N-terminal cytoplasmic domain and a larger  
293 (23-kDa) ECD, as depicted in Figure 4A. We first confirmed this predicted topology  
294 using a cysteine accessibility assay<sup>56</sup> (S1 Appendix Fig. 8, Materials and Methods, and  
295 S1 Appendix Results). Our attempts to determine the structure of recombinant, purified  
296 FisB ECD were unsuccessful, but a computational model of FisB for residues 44 to 225,  
297 covering most of the ECD is available<sup>57</sup> and is shown in Figure 4B. The model predicts  
298 a curved ECD structure, with  $\sim 3$  nm and  $\sim 5$  nm for the inner and outer radii of  
299 curvatures. The overall topology of FisB, with the predicted ECD structure is depicted in  
300 Figure 4B.

301 We probed interactions of FisB ECD with PG using a liposome co-floitation assay,  
302 illustrated in Figure 4C. Purified recombinant, soluble FisB ECD (Fig. 4A, bottom) was  
303 incubated with liposomes and subsequently layered at the bottom of a discontinuous  
304 density gradient. Upon equilibrium ultracentrifugation, the lighter liposomes float up to  
305 the interface between the two lowest density layers together with bound protein, while  
306 unbound protein remains at the bottom of the gradient. We collected fractions and  
307 determined the percentage of protein co-floated with liposomes using SDS-PAGE and  
308 densitometry, as shown in Figure 4D. We first determined that binding of FisB ECD to  
309 liposomes containing CL was not dependent on pH or the divalent ion  $\text{Ca}^{2+}$  (S1  
310 Appendix Fig. 9F,G). By contrast, the fraction of liposome-bound protein decreased  
311 rapidly as the ionic strength increased (S1 Appendix Fig. 9H). These results indicated  
312 binding was mainly electrostatic in nature.

313 At neutral pH, CL carries two negative charges, whereas PG and phosphatidylserine  
314 (PS), a lipid not normally found in *B. subtilis*<sup>58</sup>, carry only a single negative charge. If  
315 binding is mediated mainly by electrostatic interactions, then liposomes carrying PG or  
316 PS at two times the mole fraction of CL should bind nearly the same amount of FisB  
317 ECD, since the surface charge density would be the same. Indeed, similar amounts of



318 FisB ECD were bound to liposomes carrying 30% CL, 60% PG, or 60% PS (Figure 4E).  
319 FisB ECD did not bind neutral phosphatidylcholine PC liposomes<sup>23</sup>.

320 To quantify the affinity of recombinant soluble FisB ECD for CL vs PG, we then titrated  
321 liposomes containing 45 mole % CL or PG and measured binding of 100 nM FisB ECD  
322 (Figure 4F). In these experiments, we used iFluor555 labeled FisB ECD (iFluor555-FisB  
323 ECD) and detected liposome-bound protein using fluorescence rather than densitometry  
324 of SYPRO-stained gels, which extended sensitivity to much lower protein  
325 concentrations. The titration data were fit to a model to estimate the apparent  
326 dissociation constant,  $K_d$  (see Materials and Methods), which was 1.0  $\mu\text{M}$  for CL (95%  
327 confidence interval CI=0.7-2.1  $\mu\text{M}$ ) and 3.6  $\mu\text{M}$  for PG, respectively (CI=2.8-5.0, Figure  
328 4F,G).

329 Together, these results suggest that while FisB has higher affinity for CL than for PG,  
330 the higher affinity results mainly from the higher charge carried by CL. FisB does not  
331 bind CL with much specificity; at the same surface charge density, FisB ECD binds PG,  
332 or even PS which is not a *B. subtilis* lipid, with similar affinity. Thus, *in vivo* FisB is likely  
333 to bind CL as well as PG which is much more abundant.

334

### 335 **Purified FisB ECD forms soluble oligomers**

336 FisB forms clusters of various sizes in cells as described above (Figure 1, 2) and does  
337 not appear to have other protein interaction partners<sup>23</sup>. Thus, homo-oligomerization of  
338 FisB may be important for its function. We explored oligomerization of recombinant,  
339 soluble FisB ECD (Figure 5). When FisB ECD bearing a hexa-histidine tag is expressed  
340 in *E. coli* and purified to homogeneity by affinity chromatography, samples analyzed by  
341 SDS-PAGE show multiple bands corresponding to different oligomeric states (Figure 5D  
342 and S1 Appendix Figure 9B). Size-exclusion chromatography (SEC) analysis resolved  
343 the purified protein into predominant high molecular weight oligomeric structures eluting  
344 over a wide range of sizes, and low molecular weight peaks comprising minor  
345 components (Figure 5E and S1 Appendix Figure 9C, top). The minor peak at ~23 kDa  
346 (18 ml elution volume) corresponds to monomeric FisB ECD, whereas the peak at ~400  
347 kDa (15 ml) is FisB ECD that co-elutes with another protein, likely the 60 kDa  
348 chaperone GroEL, a common contaminant in recombinant proteins purified from *E. coli*  
349 (S1 Appendix Figure 9D). To rule out potential artefacts caused by the hexa-histidine  
350 affinity tag, we also purified FisB ECD using a GST-tag, which yielded similar results.  
351 The SEC of high molecular weight peaks collected from the initial chromatogram did not  
352 show a redistribution when re-analyzed (S1 Appendix Figure 9C, bottom), suggesting  
353 that once formed, the oligomeric structures are stable for an hour or longer.

354 We analyzed the high molecular-weight SEC fractions (peaks 1 and 2) using electron  
355 microscopy (EM) after negative staining. This analysis revealed rod-like structures quite  
356 homogeneous in size, ~50 nm long and ~10 nm wide (Figure 5F and S1 Appendix  
357 Figure 9E). These structures displayed conformational flexibility, which precluded  
358 structural analysis using cryoEM (and likely hampered our attempts to crystallize FisB  
359 ECD). We estimate every rod-like oligomer can accommodate ~40 copies of the  
360 predicted structure of FisB<sup>44-225</sup> shown in Figure 4B, similar to the number of FisB  
361 molecules recruited to the membrane fission site in cells (Figure 2).

362

### 363 **A FisB mutant that is selectively impaired in homo-oligomerization**

364 To determine whether self-oligomerization and lipid-binding interactions are important  
365 for FisB's function, we generated a series of mutants, characterized oligomerization and  
366 lipid-binding of the mutant proteins *in vitro*, and analyzed FisB localization dynamics and  
367 membrane fission during sporulation *in vivo*.

368 We suspected self-oligomerization of FisB was at least partially due to hydrophobic  
369 interactions. Accordingly, we first mutated conserved residues G175, I176, I195 and  
370 I196 in a highly hydrophobic region of FisB ECD (Figure 5A,B), producing a quadruple  
371 mutant, G175A,I176S, I195T, I196S (FisB<sup>GIII</sup>). These residues are on the surface of the  
372 predicted structure of FisB ECD (Figure 5C), so are not expected to interfere with  
373 folding. Purified FisB<sup>GIII</sup> ECD displayed reduced oligomerization when analyzed using  
374 SDS PAGE or size exclusion chromatography (Figure 5D,E). Though much reduced in  
375 amplitude, a broad, high molecular weight peak was still present in size exclusion  
376 chromatograms (Figure 5E). Negative-stain EM analysis of this fraction revealed  
377 oligomerization with less defined size and structure compared to wild type FisB ECD  
378 (Figure 5G).

379 To test whether lipid binding of the GIII mutant was affected, we used the co-floitation  
380 assay described above, except only two fractions were collected (Figure 5H,I). This  
381 analysis revealed that, despite being impaired in self-oligomerization, FisB<sup>GIII</sup> ECD has  
382 lipid binding properties similar to wild-type with a dissociation constant  $K_d^{GIII} = 1.6 \mu\text{M}$   
383 (95% confidence interval CI=0.9-5.1  $\mu\text{M}$ ), indistinguishable from that of wild type FisB  
384 ECD<sup>WT</sup> ( $K_d^{WT} = 1.0 \mu\text{M}$ , CI = 0.7 – 2.1  $\mu\text{M}$ , Figure 5J).

385

### 386 **FisB<sup>K168D,K170E</sup> (FisB<sup>KK</sup>) is selectively impaired in binding acidic lipids**

387 To engineer lipid-binding mutants, we took advantage of our observation that FisB  
388 binding to anionic lipids is principally mediated through electrostatic interactions (S1  
389 Appendix Figure 9H). We generated a series of mutants in which we either neutralized  
390 or inverted up to four charges (S1 Appendix Fig. 11 and S1 Appendix Table 2). The  
391 ECD of a set of charge neutralization mutants were expressed in *E. coli*, purified and  
392 tested for lipid binding using the liposome co-floitation assay. The largest reductions in  
393 lipid binding were observed when lysines in a region comprising residues 168-172 were  
394 neutralized (S1 Appendix Fig. 11A). This region corresponds to a highly positively  
395 charged pocket in the predicted model of FisB 44-225 (Figure 5C).

396 A partially overlapping set of FisB mutants were expressed in a  $\Delta fisB$  background and  
397 tested for sporulation efficiency by monitoring formation of heat-resistant colonies (S1  
398 Appendix Fig. 11B-E). Again, the strongest reductions in sporulation efficiency were  
399 found when lysines 168, 170 or 172 were mutated (S1 Appendix Fig. 11D). We decided  
400 to characterize the K168D, K170E mutation in more detail, as it produced the strongest  
401 reduction in sporulation efficiency.

402 We purified the ECD of FisB<sup>K168D,K170E</sup> (FisB<sup>KK</sup>) from *E. coli* and tested its binding to  
403 liposomes containing 45 mole % CL using the co-floitation assay (Figure 5H-J). The

404 dissociation constant for FisB<sup>KK</sup>-acidic lipid binding was  $K_d^{KK} = 9.1 \mu\text{M}$  (CI=6.5-15.3  
405  $\mu\text{M}$ ), nearly 10-fold lower than that for wild-type FisB ECD ( $K_d^{wt} = 1.0 \mu\text{M}$ , CI = 0.7 –  
406 2.1  $\mu\text{M}$ , Figure 5I,J). Importantly, formation of oligomers was not affected (Figure 5D,E).  
407 Thus, FisB<sup>KK</sup> is specifically impaired in binding to acidic lipids.

408

### 409 **FisB-lipid interactions and homo-oligomerization are important for targeting FisB** 410 **to the fission site**

411 Using the FisB mutants selectively impaired in binding to lipids or homo-oligomerization,  
412 we investigated whether these activities are important for FisB's function *in vivo*. To  
413 analyze FisB clustering and targeting to the fission site, we fused wild-type FisB or the  
414 two mutants to an N-terminal monomeric YFP (mYFP) and expressed the fusions at  
415 lower levels, which facilitated observation of ISEPs (Figure 6A). We induced these  
416 strains to sporulate and monitored FisB dynamics and membrane fission. Both the lipid-  
417 binding (FisB<sup>KK</sup>) and the oligomerization mutant (FisB<sup>GIII</sup>) were targeted to the cell  
418 membrane, unlike many other mutants we tested (S1 Appendix Figure 11E and S1  
419 Appendix Table 2). At t=1.5 h after the nutrient downshift, mYFP-FisB signals were  
420 visible in all strains without any distinguishing features. At t=2.5 h, a subset of cells  
421 expressing the wild-type FisB fusion had undergone membrane fission and these cells  
422 had an ISEP. By contrast, membrane fission was not evident in either of the mutants.  
423 By t=3 h, 25% of WT FisB cells had undergone fission, nearly always with an  
424 accompanying ISEP. In the lipid binding FisB<sup>KK</sup> mutant, only 8% of the sporulating cells  
425 had accomplished membrane fission (Figure 6B), but more than 90% of those that did  
426 had an ISEP (53/58 cells). Membrane fission events and the accompanying bright  
427 mYFP-FisB spots were very rare (0.6%) in the oligomerization-deficient FisB<sup>GIII</sup> mutant.

428 The distribution of fluorescence intensities of the foci from low-expression WT and KK  
429 cells were indistinguishable (Figure 6C). Using the DNA-origami fluorescence intensity  
430 calibration (Figure 2), we estimate  $6 \pm 2$  copies of low-expression FisB WT or the KK  
431 mutant to have accumulated at the fission site. For the GIII mutant, there were not  
432 enough cells with an intense spot to perform a similar analysis.

433 From TMA-DPH labeling, we determined the fraction of cells that successfully  
434 completed fission as a function of time (Figure 6D). Oligomerization-deficient FisB<sup>GIII</sup>  
435 was not able to induce fission, whereas the lipid-binding mutant FisB<sup>KK</sup> had a partial, but  
436 severe defect (~50% reduction compared to wild-type). Importantly, both mutants were  
437 expressed at levels similar to the wild-type (S1 Appendix Fig. 10), so the defects to form  
438 an ISEP and undergo membrane fission are not due to lower expression levels.

439 Together, these results suggest FisB-lipid and FisB-FisB interactions are both important  
440 for targeting FisB to the fission site.

441

### 442 **C. *perfringens* FisB can substitute for *B. subtilis* FisB**

443 So far, our results suggest FisB-FisB and FisB-acidic lipid interactions are the main  
444 drivers for targeting FisB to the membrane fission site. If no other partners are involved,  
445 FisB should be largely an independent fission module, i.e. FisB homologs from different

446 sporulating bacteria should be able to substitute for one another at least partially, even if  
447 sequence homology is low outside the consensus region. To test this idea, we  
448 expressed *Clostridium perfringens* FisB (FisB<sup>Cperf</sup>) in *B. subtilis* cells lacking FisB  
449 (BAL005). The sequence identity is only 23% between FisB sequences from these two  
450 species. In the heat-kill assay, FisB<sup>Cperf</sup> fully rescued *B. subtilis*  $\Delta$ *fisB* defects (Figure  
451 7A). *C. perfringens* FisB fused to mEGFP (mEGFP-FisB<sup>Cperf</sup>) had similar dynamics as  
452 FisB<sup>Bsubti</sup>, forming DMCs at early times that gave way to an ISEP where membrane  
453 fission occurs (Figure 7B). Population kinetics of membrane fission were slower with  
454 FisB<sup>Cperf</sup> (Figure 7C), but nearly every cell that underwent fission had an ISEP as for the  
455 wild type protein (220/239, or 92%). The intensity distribution of mEGFP-FisB<sup>Cperf</sup> ISEP  
456 was shifted to smaller values compared to mEGFP-FisB<sup>Bsubti</sup> ISEP (Figure 7D). Since  
457 the average ISEP intensity for FisB<sup>Bsubti</sup> corresponds to ~40 copies (Figure 2), we  
458 deduce ~9 copies of FisB<sup>Cperf</sup> accumulate at ISEP at the time of membrane fission. At  
459 t=3 h into sporulation, the percentage of cells with an ISEP was lower for cells  
460 expressing mEGFP-FisB<sup>Cperf</sup> (Figure 7E).

461 In all conditions tested so far, nearly all cells that had undergone membrane fission also  
462 had an intense FisB spot at the engulfment pole (Figs. 2,3,6, and 7). When we plotted  
463 the percentage of cells having an ISEP against the percentage of cells that have  
464 undergone fission at t=3 h, we found a nearly perfect correlation (Figure 7F). FisB<sup>Cperf</sup> fit  
465 this pattern well, despite having a low sequence identity to FisB<sup>Bsubti</sup>, suggesting a  
466 common localization and membrane fission mechanism, likely based on a few  
467 conserved biophysical properties.

468

#### 469 **FisB does not have a preference for highly curved membrane regions, but can** 470 **bridge membranes**

471 A number of proteins localize to sub-cellular sites due to their preference for curved  
472 membrane regions<sup>59-62</sup>. During late stages of engulfment, the most highly curved region  
473 in the cell is the membrane neck connecting the engulfment membrane with the rest of  
474 the mother cell membrane and this is where FisB accumulates. We therefore asked  
475 whether curvature-sensing could be a mechanism driving FisB's localization. To test this  
476 possibility, we undertook three independent series of experiments.

477 First, we used the principle that any protein which preferentially binds curved  
478 membranes at low membrane coverage can also induce membrane curvature when  
479 present at sufficiently high coverage<sup>60,63</sup>. Thus, we tested whether the soluble ECD of  
480 FisB could generate curved regions in highly malleable membranes of giant unilamellar  
481 vesicles (GUVs) at high coverage. We incubated 2  $\mu$ M purified soluble FisB ECD  
482 labeled with iFluor555 with GUVs and monitored protein coverage and membrane  
483 deformations using spinning-disc confocal microscopy. Even when the GUV  
484 membranes were covered uniformly with iFluor555-FisB ECD we could not observe any  
485 GUV membrane deformations (Figure 8A). As a positive control, we used purified  
486 Endophilin A1 (EndoA1, labeled with Atto395), an N-BAR domain containing endocytic  
487 protein<sup>64-66</sup>. We incubated 2  $\mu$ M EndoA1 with GUVs composed of 45% DOPS, 24.5%  
488 DOPC, 30% DOPE and 0.5% DiD, which resulted in extensive tubulation of GUV  
489 membranes (Figure 8A), as reported previously<sup>67</sup>. Importantly, the difference in the

490 membrane sculpting ability of the two proteins is not due a weaker affinity of FisB ECD  
491 for membranes ( $K_d \approx 1 \mu\text{M}$  for membranes with 45 mole % CL, Figure 4F) compared to  
492 endophilin ( $K_d = 1.15 \mu\text{M}$  for membranes containing 45% DOPS, 30% DOPE, 24.5%  
493 DOPC, 0.5% TR-DHPE<sup>65</sup>).

494 Second, we slowly deflated GUVs to facilitate any potential membrane curvature  
495 generation by FisB ECD (which works against membrane tension) and/or to provide  
496 curved regions to test if FisB ECD accumulated there. Deflated GUVs displayed curved  
497 regions because their larger surface-to-volume ratios no longer allowed spherical  
498 shapes. Even under these favorable conditions, FisB ECD was not able to generate  
499 highly curved regions on these deflated GUVs (Figure 8B). In addition, if FisB ECD had  
500 a preference for negatively (positively) curved regions, it should accumulate at such  
501 regions while being depleted from positively (negatively) curved areas. Quantification of  
502 FisB ECD coverage at negatively or positively curved membrane regions showed no  
503 curvature preference (Figure 8B).

504 Third, we tested if FisB's localization in live *B. subtilis* cells depended on membrane  
505 curvature. To avoid potentially confounding effects of other cues that may be present  
506 during sporulation, we expressed GFP-FisB under an inducible promoter during  
507 vegetative growth. In addition, we blocked cell division by inducing expression of MciZ<sup>68</sup>.  
508 MciZ normally blocks binary cell division during sporulation, but when expressed during  
509 vegetative growth, cells grow into long flexible filaments that are bent to varying  
510 degrees, providing regions with different membrane curvatures. We imaged GFP-FisB  
511 spots along curved edges of these filaments and plotted the linear density of GFP-FisB  
512 spots (spots/ $\mu\text{m}$ ) as a function of filament curvature (Figure 8C). There was no clear  
513 correlation between GFP-FisB spot density and filament curvature. Although this  
514 method generates a limited amount of curvature, a similar approach was previously  
515 used to show that DivIVA preferentially localizes to negatively curved regions<sup>69</sup>.

516 In the GUV experiments, we noticed that FisB ECD caused GUVs to adhere to one  
517 another when they came into contact, accumulating at the adhesion patch between the  
518 membranes and at the rims (Figure 8D). Absorbance measurements using small  
519 unilamellar vesicles (SUVs) confirmed that FisB ECD can bridge membranes and  
520 aggregate liposomes (Figure 8E).

521 Overall, these experiments suggest that FisB does not have any intrinsic membrane  
522 curvature sensing/sculpting ability, but it can bridge membranes.

523

### 524 **Modeling suggests self-oligomerization and membrane bridging are sufficient to** 525 **localize FisB to the membrane neck**

526 To test the hypothesis that the homo-oligomerization, lipid-binding and the unique  
527 membrane topology could be sufficient to recruit FisB to the membrane neck, we  
528 considered a minimal model based on free energy minimization. As depicted in Figure  
529 9, we consider the free energy  $F$  of an axisymmetric membrane neck of radius  $R$  and  
530 length  $L$  connecting two membrane sheets, corresponding to the local geometry where  
531 the engulfment membrane meets the rest of the mother cell membrane. We assume the  
532 surface density  $\phi$  of FisB proteins in the neck is uniform and reaches equilibrium with a

533 surface density  $\phi_0$  of FisB in the surrounding membranes, and ask whether the neck  
 534 geometry alone is enough to account for the observed FisB accumulation. The energy  
 535 functional consists of a term accounting for membrane bending and tension,  $F_m$ , and  
 536 another term accounting for FisB protein-protein interactions,  $F_p$ . We employ the  
 537 classical Helfrich-Canham theory<sup>70-75</sup> for the energy of the membrane

$$538 \quad F_m = \int_{S_n} dS_n \left[ \frac{\kappa}{2} H^2 + \gamma \right] + \int_{S_s} dS_s \gamma, \quad (1)$$

539 where  $S_n$  and  $S_s$  are the surfaces of the membrane neck and sheets,  $H$  is twice the  
 540 mean curvature,  $\kappa$  is the bending modulus, and  $\gamma$  is the surface tension. The two  
 541 membrane sheets are assumed to be planar, thus their only contribution to the energy  
 542 comes from membrane tension.

543 For FisB, we include translational entropy, the energy of homo-oligomerization in trans  
 544 between opposing membranes, and an energy that limits crowding. As shown above,  
 545 FisB proteins do not exhibit curvature sensing, so we do not include a term coupling  
 546 FisB density to membrane curvature in Eq. (1). This results in the following expression  
 547 for the protein free energy

$$548 \quad F_p = \int_{S_n} dS_n \left\{ k_B T \phi \ln \left( \frac{\phi}{\phi_0} \right) + a V_{LJ}(R) \phi^2 + U(\phi) \right\}, \quad (2)$$

549 where the first term accounts for translational entropy, the second term is an energy per  
 550 unit area accounting for trans interactions of FisB, and which for simplicity is assumed  
 551 to be proportional to the standard Lennard–Jones (LJ) potential accounting for a longer-  
 552 range attraction and shorter-range repulsion,

$$553 \quad V_{LJ}(r) = \left( \frac{\sigma}{r} \right)^{12} - \left( \frac{\sigma}{r} \right)^6, \quad (3)$$

554 and finally  $U(\phi)$  is an energy penalty for crowding that increases rapidly above a certain  
 555 FisB concentration. To obtain  $U(\phi)$  we assume a purely repulsive, truncated and shifted  
 556 LJ potential between cis-neighboring FisB molecules, which we take to occupy a  
 557 triangular lattice. Therefore,  $U(\phi) = \epsilon [V_{LJ}(r(\phi)) - V_{LJ}(r_{\max})]$  when  $r \leq r_{\max}$  and 0 when  
 558  $r > r_{\max}$ , where we have chosen  $r_{\max} = 2^{1/6} \sigma_{\text{cis}}$ , namely the minimum of the LJ potential  
 559 with length scale  $\sigma_{\text{cis}}$ . The result is

$$560 \quad U(\phi) = \epsilon \frac{(\phi^3 - \phi_{r_{\max}}^3)^2}{4\phi_{r_{\max}}^6} \text{ for } \phi \geq \phi_{r_{\max}} \text{ or } 0 \text{ for } \phi < \phi_{r_{\max}}, \quad (4)$$

561 Where  $\phi_{r_{\max}} = 2^{2/3} / (3^{3/2} \sigma_{\text{cis}}^2) = 2 / (3^{3/2} r_{\max}^2)$  is the FisB concentration corresponding to a  
 562 nearest neighbor distance  $r_{\max}$ .

563 We minimize  $F = F_m + F_p$  with respect to  $\phi$  to obtain an equation for the equilibrium  
 564 density of FisB proteins in the neck

$$565 \quad k_B T \left[ 1 + \ln \left( \frac{\phi}{\phi_0} \right) \right] + 2a\phi \left[ \left( \frac{\sigma}{R} \right)^{12} - \left( \frac{\sigma}{R} \right)^6 \right] + \partial_\phi U(\phi) = 0. \quad (5)$$

566 Then, minimizing  $F$  with respect to  $R$  yields an equation that determines the equilibrium  
 567 radius of the neck

568 
$$\gamma_{\text{eff}} - \frac{\kappa}{2R^2} + a\phi^2 \left[ 6 \left( \frac{\sigma}{R} \right)^6 - 12 \left( \frac{\sigma}{R} \right)^{12} \right] - \frac{2\gamma R}{L} = 0, \quad (6)$$

569 where  $\gamma_{\text{eff}} = \gamma + k_B T \phi \ln \left( \frac{\phi}{\phi_0} \right) + U(\phi)$ .

570 Figure 9B shows  $R$  and  $\phi$  as functions of the FisB trans homo-oligomerization strength  
571  $a$ , for different values of surface tension  $\gamma$  and neck length  $L$ . For realistic parameters  
572 (the dot), we find that FisB trans interactions are strong enough to stabilize the neck at  
573  $R \sim 3$  nm, with a close-packed concentration of FisB in the neck  $\phi \approx \phi_{r_{\text{max}}}$ . For these  
574 same parameters, there is a critical lower limit of  $a$  below which the FisB interactions  
575 are too weak to stabilize the neck, so the neck opens, i.e.  $R \rightarrow \infty$  in our simple model.  
576 Additionally, Figure 9B shows that the shorter the length of the neck  $L$ , the stronger the  
577 trans interactions needed to stabilize the neck at a finite radius. This makes intuitive  
578 sense: the longer the neck, the more FisB can be present to hold the neck together in  
579 opposition to membrane tension. (Note that expanding the radius of the neck actually  
580 decreases the total membrane area, which is the sum of the membrane in the neck and  
581 in the parallel sheets, so that surface tension tends to make the neck expand – see S2  
582 Appendix).

583 While the above results suggest that an accumulation of FisB at the neck can be  
584 energetically stable, one question is how long it might take to reach that state? We  
585 expect nucleation of a critical cluster of FisB to be rate limiting, since the time required  
586 for diffusion and capture to reach  $\sim 40$  FisB in the neck is quite short  $\sim 3.9$  s (see S2  
587 Appendix). To obtain a simple estimate of the nucleation time for both low-expression  
588 and native-expression strains, we assume that FisB proteins diffuse independently on  
589 the entire membrane and that nucleation of a stable cluster in the neck occurs when  $n$   
590 proteins happen to be in the neck at the same time. To this end, we need to estimate  
591 the fraction of time there are  $n$  or more FisB in the neck, as well as the correlation time,  
592 i.e. the time between uncorrelated samples. Since we assume FisB proteins are  
593 independent, the number of proteins in the neck will be Poisson distributed, so we only  
594 need to know the average in the neck to obtain the full distribution. The average number  
595 of FisB in the neck is its area,  $2\pi RL$ , times the background concentration,  $\phi_0$ .  
596 Furthermore, the correlation time is simply the time for a FisB to diffuse the length of the  
597 neck  $L^2/D$ . Using  $\phi_0 \approx 20$  FisB  $\mu\text{m}^{-2}$  (see "About 40 FisB molecules accumulate at the  
598 engulfment pole to mediate membrane fission" above) for the low-expression strain  
599 yields  $\langle \text{FisB} \rangle \approx 0.03$  in the neck. Assuming that the one-hour delay in membrane fission  
600 during sporulation of low-expression strain is due to the time for nucleation, we can infer  
601 that the number of FisB proteins required for nucleation is  $n \approx 3$  (see S2 Appendix). If  
602 the native-expression strain also needs  $n \approx 3$  to nucleate, we can estimate its  
603 corresponding nucleation time using  $\phi_0 \approx 100$  FisB  $\mu\text{m}^{-2}$ , which yields  $\langle \text{FisB} \rangle \approx$   
604  $0.15$  and a nucleation time of  $\sim 30$  s. We conclude that for native expression levels of  
605 FisB, nucleation of a stable cluster of FisB at the neck is not likely to be rate limiting for  
606 the process of membrane fission.

607

## 608 DISCUSSION

609 Previously, we showed that FisB is required for the membrane fission event that marks

610 the completion of engulfment of the forespore by the mother cell<sup>23</sup>. Here, we found that  
611 a cluster of FisB molecules is nearly always present at the membrane fission site as  
612 evidenced by an intense fluorescent spot at the engulfment pole (ISEP) using  
613 fluorescently tagged FisB. The number of FisB molecules accumulated at the ISEP  
614 correlates well with the fraction of cells having undergone membrane fission at a given  
615 time point after induction of sporulation (Figs. 1,7). In addition, the number of wild-type  
616 FisB molecules per ISEP correlates with the total number of FisB molecules per cell (S1  
617 Appendix Figure 4). Thus, the kinetics of membrane fission is determined by the  
618 accumulation of FisB molecules at the fission site. Lowering FisB expression could slow  
619 membrane fission by slowing the accumulation of FisB at the pole, or by reducing the  
620 number of FisB molecules driving fission after they are localized at the fission site. Our  
621 modeling results are consistent with slower ISEP nucleation in the low-expression  
622 strain, however, currently, we cannot experimentally distinguish between the two  
623 possibilities, and both may be operating simultaneously.

624 How is FisB recruited to the fission site? Our results suggest FisB does not rely on  
625 existing landmarks, lipid microdomains, cell-wall remodeling machinery, pH or voltage  
626 gradients across the cell membrane, or membrane curvature cues for its dynamic  
627 localization. In addition, we could not detect proteins interacting with FisB other than  
628 itself using an anti-GFP resin pulling on YFP-FisB<sup>23</sup>. By contrast, we found self-  
629 oligomerization and binding to acidic lipids to be critical for FisB's function, and purified  
630 FisB ECD can bridge artificial membranes. Together, these results suggest FisB-FisB  
631 and FisB-lipid interactions are key drivers for FisB clustering and accumulation at the  
632 membrane fission site.

633 Can FisB oligomerization and lipid binding be sufficient to accumulate an immobile  
634 cluster of FisB molecules at the engulfment pole? Modeling suggests this is indeed the  
635 case. First, the narrow neck enables FisB's on opposing membranes to come close  
636 enough to interact in trans. We infer this to be the preferred orientation for FisB-FisB  
637 interaction, since otherwise large clusters would be expected to form elsewhere as well.  
638 Second, the unique geometry of the neck connecting the engulfment membrane to the  
639 rest of the mother cell membrane plays an important role, as this is the only region in  
640 the cell where a cluster of FisB molecules can be "trapped", i.e., once a cluster is  
641 formed inside the neck, it cannot diffuse away without breaking apart. This idea is  
642 supported by the fact that we do not observe any FisB accumulation at the leading edge  
643 of the engulfment membrane until a thin neck has formed at the end of engulfment.

644 The first FisB oligomers that appear during sporulation are dim, mobile clusters (DMCs),  
645 each containing about a dozen FisB molecules. (One possibility is that the DMCs may  
646 correspond to local membrane folds stabilized by FisBs interacting in trans.) Diffusion of  
647 DMCs appears to be Brownian on the 10-20 s time scale (Figure 2), though a rigorous  
648 analysis would require taking into account the geometry of the system. A DMC can  
649 diffuse a typical distance of  $\sim 1 \mu\text{m}$  in  $\sim 5 \text{ min}$  ( $D_{DMC} \approx 3 \times 10^{-3} \mu\text{m}^2/\text{s}$ , Figure 2E). By  
650 comparison, engulfment in individual cells takes  $\sim 60 \text{ min}$  on average<sup>76</sup>. Though the  
651 engulfment time is much longer than the DMC diffusion time, the neck region, with an  
652 inner diameter of several nanometers, only forms at the very end of the engulfment  
653 process. Thus,  $\sim 40$  FisB molecules could be recruited to the neck through diffusion-  
654 limited capture of a few DMCs. However, we could not image such capture events



655 directly, and cannot rule out that FisB can also diffuse as monomers and could be  
656 recruited to the neck in that form. Indeed, a simple model of the rate of nucleation of a  
657 cluster of FisBs at the neck suggests that as few as three FisBs interacting in trans  
658 could be sufficient to form a stable cluster there, with a nucleation time significantly  
659 shorter than the engulfment time at native expression levels.

660 How many FisB molecules are needed for efficient membrane fission? In cells  
661 completely lacking FisB, ~5% of the cells undergo membrane fission by  $t=3$  h,  
662 compared to ~80 % or ~30% for cells expressing FisB at native or ~8-fold reduced  
663 levels, respectively (Figure 1F). The former achieve fission with ~40 copies, while the  
664 latter with only ~6. Thus, FisB is not absolutely required for membrane fission, but it  
665 makes it much more efficient, i.e. FisB catalyzes membrane fission. The variable  
666 stoichiometry suggests that FisB does not oligomerize into a specific quaternary  
667 structure with a definite stoichiometry. This variability appears to be a common property  
668 among proteins catalyzing membrane fusion and fission, such as SNAREs<sup>77-79</sup> or  
669 dynamin<sup>14</sup>. The smallest clusters associated with membrane fission had ~6 FisB copies  
670 on average. This number is likely sufficient to form at least one ring inside the  
671 membrane neck that eventually undergoes fission. Given that fission can occur in the  
672 absence of FisB, it is likely that the FisB cluster cooperates with other cellular processes  
673 to produce stress on this membrane neck.

674 We found FisB dynamics and membrane fission are not affected by removal of CL, PE,  
675 or both. CL and PE are widely implicated in membrane fission and fusion reactions due  
676 to their tendency to form non-bilayer structures<sup>48,80-83</sup>. The fact that CL or PE do not  
677 affect membrane fission during sporulation is remarkable, because such lipids usually  
678 affect the kinetics and/or the extent of fusion/fission reactions even if they are not  
679 absolutely required<sup>81</sup>. We tested the role of CL in a strain that lacked all three known CL  
680 synthases, with no detectable CL levels. A previous study reported that in  $\Delta cIsABC$  *B.*  
681 *subtilis* cells, CL levels increase from undetectable during vegetative growth to readily  
682 detectable during sporulation<sup>31</sup>, suggesting a yet unidentified sporulation-specific CL  
683 synthase may exist. Our results differ from those of Kawai et al. in that we were unable  
684 to detect any CL in  $\Delta cIsABC$  *B. subtilis* cells during vegetative growth or sporulation. We  
685 suggest the differences may be due to the different strain backgrounds used<sup>84</sup>, PY79<sup>85</sup>  
686 here vs. Bs168<sup>86</sup> in Kawai et al. or differences in detection sensitivities.

687 Overall, our results suggest FisB localizes to the membrane fission site using only lipid-  
688 binding, homo-oligomerization, and the unique geometry encountered at the end of  
689 engulfment. We propose that accumulation of a high enough density of FisB leads to  
690 membrane fission, possibly by generating increased stress in the FisB network-  
691 membrane composite, or in cooperation with another cellular process. A FisB  
692 homologue with low sequence identity partially rescued fission defects in  $\Delta fisB$  *B.*  
693 *subtilis* cells, consistent with the idea that FisB acts as an independent module relying  
694 mainly on homo-oligomerization, lipid-binding, and sporulation geometry.

695

696

697 **MATERIALS AND METHODS**

## 698 **Materials**

699 *E. coli* cardiolipin (CL), *E. coli* L- $\alpha$ -phosphatidylglycerol (PG), egg L- $\alpha$ -  
700 phosphatidylcholine (eggPC), *E. coli* L- $\alpha$ -phosphatidylethanolamine (PE), 1,2-dioleoyl-  
701 sn-glycero-3-phosphoethanolamine-N-(7-nitro-2-1,3-benzoxadiazol-4-yl) (NBD-PE), 1,2-  
702 dioleoyl-sn-glycero-3-phosphoethanolamine (DOPE), 1,2-dioleoyl-sn-glycero-3-  
703 phosphocholine (DOPC), 1,2-dioleoyl-sn-glycero-3-phospho-L-serine (DOPS) were  
704 purchased from Avanti Polar Lipids. 1-(4-Trimethylammoniumphenyl)-6-Phenyl-1,3,5-  
705 Hexatriene *p*-Toluenesulfonate (TMA-DPH) and *N*-(3-Triethylammoniumpropyl)-4-(6-(4-  
706 (Diethylamino) Phenyl) Hexatrienyl) Pyridinium Dibromide (FM4-64), and 1,1'-  
707 Dioctadecyl-3,3,3',3'-Tetramethylindodicarbocyanine (DiD) were from Thermo Fisher  
708 Scientific. Molybdenum Blue spray reagent was from Sigma-Aldrich. Carbonyl  
709 cyanide *m*-chlorophenyl hydrazone (CCCP) was purchased from Abcam and  
710 valinomycin was purchased from VWR. 3-(*N*-maleimidylpropionyl)biocytin (MBP) was  
711 obtained from Invitrogen and the HRP-conjugated antibody from eBioscience. Zaragozic  
712 acid was purchased from Sigma-Aldrich. 4-acetamido-4'-maleimidylstilbene-2,2'-  
713 disulfonic acid (AMS) and zaragozic acid were from obtained from Cayman Chemical  
714 Company.

## 715 **General *B. subtilis* methods**

716 *B. subtilis* strains were derived from the prototrophic strain PY79<sup>85</sup>. Sporulation was  
717 induced in liquid medium at 37°C by nutrient exhaustion in supplemented DS medium  
718 (DSM)<sup>87</sup> or by resuspension according to the method of Sterlini & Mandelstam<sup>88</sup>.  
719 Sporulation efficiency was determined in 24–30 h cultures as the total number of heat-  
720 resistant (80°C for 20 min) colony forming units (CFUs) compared to wild-type heat-  
721 resistant CFUs. Lipid synthesis mutants were from the *Bacillus* knock-out (BKE)  
722 collection<sup>89</sup> and all were back-crossed twice into *B. subtilis* PY79 before assaying and  
723 prior to antibiotic cassette removal. Antibiotic cassette removal was performed using the  
724 temperature-sensitive plasmid pDR244 that constitutively expresses Cre recombinase<sup>89</sup>.  
725 Cassette removal was further confirmed by PCR with primers flanking the deletion. *B.*  
726 *subtilis* strains were constructed using plasmidic or genomic DNA and a 1-step  
727 competence method. Site directed mutagenesis was performed using Agilent's Quick-  
728 change Lightning kit following manufacturer's instructions and mutations were confirmed  
729 by sequencing. The strains and plasmids used in this study are listed in S1 Appendix  
730 Tables 2 and 3, respectively.

## 731 **Live-cell fluorescence microscopy of *B. subtilis***

732 Cells were mounted on a 2% agarose pad containing resuspension medium using a  
733 gene frame (Bio-Rad). Cells were concentrated by centrifugation (3300g for 30 s) prior  
734 to mounting and visualization. This step had no impact on the localization of the fusion  
735 proteins. Fluorescence microscopy was performed using a Leica DMI8 wide-field  
736 inverted microscope equipped with an HC PL APO 100×DIC objective (NA=1.40) and  
737 an iXon Ultra 888 EMCCD Camera from Andor Technology. Membranes were stained  
738 with TMA-DPH at a final concentration of 100  $\mu$ M. Excitation light intensity was set to  
739 50% and exposure times were 300 ms for TMA-DPH ( $\lambda_{ex}$ =395/25 nm;  $\lambda_{em}$ =460/50 nm);  
740 500 ms for m(E)GFP ( $\lambda_{ex}$ =470/40;  $\lambda_{em}$ =500-550) and 1 s for mYFP ( $\lambda_{ex}$ =510/25;  
741  $\lambda_{em}$ >530) respectively. Images were acquired with Leica Application Suite X (LAS X)

742 and analysis and processing were performed using the ImageJ software<sup>90</sup>.

### 743 **Determination of FisB's topology**

744 We used the substituted cysteine accessibility method (SCAM<sup>91</sup>) to determine the  
745 topology of FisB. We first generated strains expressing FisB versions with a single  
746 cysteine substitution at position G6, L137, or A245, in a *ΔfisB* background. FisB does  
747 not have any endogenous cysteines. These point mutations decreased the sporulation  
748 efficiency slightly (S1 Appendix Table 2), we assume without affecting the topology. We  
749 selectively biotinylated extra- or intracellular cysteines of *B. subtilis* protoplasts,  
750 produced by addition of 0.5 mg/ml lysozyme and incubating cells at 37°C for 1h with  
751 gentle rocking. Protoplasts were then incubated with the membrane-impermeant  
752 reagent 3-(N-maleimidylpropionyl)biocytin (MBP). To selectively label extracellular  
753 cysteines, protoplasts of sporulating cells at 2.5 h into sporulation were incubated with  
754 100 μM MPB. The reaction was quenched with 50 mM DTT before cells were lysed with  
755 hypotonic shock. To label intracellular cysteines selectively, extracellular cysteines of  
756 protoplasts were first blocked AMS before cells were lysed and incubated with 100 μM  
757 MPB. The reaction was quenched by addition of 100 μM MPB. FisB was pulled down  
758 from the cell lysates as described in<sup>91</sup> using an anti-Myc antibody (mAb #2276) and  
759 biotinylated proteins were detected by Western Blot using a HRP-conjugated-Avidin  
760 antibody. Further details are provided in the S1 Appendix.

### 761 **Expression, purification, and labeling of recombinant FisB protein**

762 Recombinant soluble FisB ECD was purified as described in<sup>23</sup> but with slight  
763 modifications. Briefly, His<sub>6</sub>-FisB ECD was expressed in *E. coli* BL21 (DE3) from New  
764 England Biolabs and purified using HisPur™ Ni-NTA Resin from Thermo Fisher  
765 Scientific. Protein expression was induced with 1 mM IPTG at OD<sub>600</sub> = 0.6 overnight at  
766 16°C. Cells were harvested by centrifugation and the pellet was resuspended in Lysis  
767 Buffer (20 mM HEPES, 500 mM NaCl, 0.5 mM TCEP, 20 mM Imidazole, 2% glycerol,  
768 20 mM MgCl<sub>2</sub>) and flash-frozen in liquid nitrogen. Pellets were thawed on ice and cells  
769 were lysed by 5 passes through a high-pressure homogenizer (Avestin EmulsiFlex-C3).  
770 The lysate was spun down at 100,000×g and the soluble fraction was incubated with  
771 HisPur™ Ni-NTA Resin for 2.5 h at 4°C while rotating. The bound protein was washed  
772 with Lysis Buffer, Lysis Buffer containing 50 mM and finally 100 mM Imidazole. The  
773 protein was eluted in Elution Buffer (20 mM HEPES, 500 mM NaCl, 0.5 mM TCEP, 200  
774 mM Imidazole, 2% glycerol, 20 mM MgCl<sub>2</sub>). The protein was concentrated using a  
775 Vivaspin centrifugal concentrator with a 10 kDa molecular weight cutoff and the  
776 concentration determined by Bradford protein assay. The protein was stored at -80°C.

777 In experiments with labeled FisB ECD, we used a cysteine mutation, G123C (FisB ECD  
778 does not have any endogenous cysteines). After expression and purification as above,  
779 iFluor555-maleimide (AAT Bioquest) was reacted with FisB ECD<sup>G123C</sup> following the  
780 manufacturer's instructions. G123 is in a loop that if removed does not interfere with  
781 FisB's function (S1 Appendix Figure 10).

### 782 **Analytical size-exclusion chromatography (SEC) and negative-stain electron** 783 **microscopy (EM)**

784 For SEC analysis His<sub>6</sub>-FisB ECD was loaded onto a Superose 6 Increase 10/300 GL

785 column (GE) previously equilibrated with 20 mM HEPES, pH 7.5, 500 mM NaCl, 0.5 mM  
786 TCEP, 2% glycerol, 20 mM MgCl<sub>2</sub>, running at a flow rate of 0.5 ml/min at 4°C. The  
787 column was calibrated with Bio-Rad's Gel Filtration Standards. For negative stain EM  
788 analysis, 4 µL of the indicated elution fractions were applied to 200-mesh copper grids  
789 coated with ~10 nm amorphous carbon film, negatively stained with 2% (wt/vol) uranyl  
790 acetate, and air-dried. Images were collected on a FEI Tecnai T12 microscope, with a  
791 LaB6 filament operating at 120 kV, and equipped with a Gatan CCD camera.

## 792 **Inhibition of cell wall synthesis and analyses of FisB motions**

793 Overnight cultures of GFP-Mbl (BDR2061) or IPTG-induced mGFP-FisB (BMB014)  
794 were diluted in CH medium to OD600 = 0.05. Expression of GFP-FisB was induced with  
795 1 mM IPTG for 2h at 37°C. Expression of GFP-Mbl was induced with 10 mM xylose for  
796 30 min when BDR2061 reached OD600 = 0.5. For imaging untreated cells, 1 ml of cells  
797 was washed twice with 1 ml PBS and finally resuspended in 10 µl PBS. 2 µl of cell  
798 suspension was spread on a 2% PBS agar pad for imaging. To inhibit cell-wall  
799 synthesis 50 µg/ml fosfomycin was added to the cultures 45 min before imaging. 1 ml of  
800 cells was washed twice with PBS containing 50 µg/ml fosfomycin and mounted on a  
801 PBS agar pad also containing fosfomycin. Cells were imaged using a Olympus IX81  
802 microscope with a home-built polarized TIRF setup<sup>92,93</sup>. Exposure times were 50 ms for  
803 BDR2061 and 100 ms for BMB014. Movies were acquired at 1 frame/s. Movies  
804 collected for BMB014 were corrected for bleaching using the Bleaching Correction  
805 function (exponential method) in ImageJ. Kymographs were created with imageJ along  
806 the indicated axes. GFP fusion proteins were tracked using the ImageJ plugin  
807 TrackMate<sup>94</sup>. A Laplacian of Gaussian (LoG) filter was used to detect particles with an  
808 estimated blob diameter 400 µm. Particles were tracked using the Simple LAP tracker  
809 with a 0.25 µm maximum linking distance and no frame gaps. MATLAB (Mathworks,  
810 Natick, MA) was used for further processing of the tracks. Mean squared displacement  
811 (MSD) was calculated using the MATLAB class @msdanalyzer<sup>95</sup>.

812 The asymmetry of individual tracks (S1 Appendix Fig. 5F) was calculated as described  
813 in<sup>96</sup> using:

$$814 \quad \text{Asym} = -\log \left( 1 - \frac{(R_1^2 - R_2^2)^2}{(R_1^2 + R_2^2)^2} \right)$$

815 where  $R_1$  and  $R_2$  are the principal components of the radius of gyration, equal to the  
816 square roots of the eigenvalues of the radius of gyration tensor  $\mathbf{R}_g$ :

$$817 \quad \mathbf{R}_g(i, j) = \langle x_i x_j \rangle - \langle x_i \rangle \langle x_j \rangle.$$

## 818 **Tracking fluorescently labeled FisB spots and estimation of diffusion coefficients**

819 For estimating the mobility of DMC and ISEP, time-lapse movies were recorded with a  
820 frame rate of 1 s using wide-field microscopy (50% LED intensity, 300 ms exposure  
821 time, gain 300). Spot positions were tracked using SpeckleTrackerJ<sup>97</sup>, a plugin for the  
822 image analysis software ImageJ<sup>90</sup>. Mean-squared displacements (MSDs) were  
823 calculated using the MATLAB class @msdanalyzer<sup>95</sup>.

## 824 **Dissipation of membrane potential**

825 Cells were concentrated by centrifugation (3300xg for 30 s) and 100  $\mu$ M CCCP or 30  
826  $\mu$ M valinomycin was added just prior to mounting cells onto a 2% PBS agar pad also  
827 containing 100  $\mu$ M CCCP or 30  $\mu$ M valinomycin.

### 828 **Lipid extraction and thin-layer chromatography (TLC)**

829 Lipids were extracted from *B. subtilis* cells at 3 h into sporulation according to the  
830 method of Lacombe and Lubochinsky<sup>98</sup>. Lipid extracts were analyzed by TLC on silica  
831 gel plates in mixtures of chloroform:hexane:methanol: acetic acid (50:30:10:5).  
832 Phospholipids were detected with Molybdenum Blue Reagent (Sigma-Aldrich).

### 833 **Liposome preparation**

834 Small unilamellar vesicles (SUVs) were prepared by mixing 1  $\mu$ mol of total lipids at  
835 desired ratios. A thin lipid film was created using a rotary evaporator (Buchi). Any  
836 remaining organic solvent was removed by placing the lipid film under high vacuum for  
837 2h. The lipid film was hydrated with 1 ml of RB-EDTA buffer [25 mM HEPES at pH 7.4,  
838 140 mM KCl, 1 mM EDTA, 0.2 mM tris(2-carboxyethyl) phosphine] by shaking using an  
839 Eppendorf Thermomix for >30 min. The lipid suspension was then frozen and thawed 7  
840 times using liquid nitrogen and a 37°C water bath and subsequently extruded 21 times  
841 through a 100 nm pore size polycarbonate filter using a mini-extruder (Avanti). All SUVs  
842 contained 1% NBD-PE to determine the final lipid concentration.

843 Giant unilamellar vesicles (GUVs) were prepared by electroformation<sup>99</sup>. Briefly, lipids  
844 dissolved in chloroform were mixed in a glass tube at desired ratios and spotted on two  
845 indium tin oxide (ITO) coated glass slides. Organic solvent was removed by placing the  
846 lipid films in a vacuum desiccator for at least 2 h. A short strip of copper conductive tape  
847 was attached to each ITO slide which were then separated by a 3 mm thick  
848 Polytetrafluoroethylene (PTFE) spacer and held together with binder clips. The chamber  
849 was filled with 500  $\mu$ l Swelling Buffer (1 mM HEPES, 0.25 M sucrose, 1 mM DTT) and  
850 sealed with Critoseal (VWR International, Radnor, PA). GUVs were formed by applying  
851 a 1.8 V sinusoidal voltage at 10 Hz for at least 2 h at room temperature.

852 For experiments involving FisB ECD the GUVs were composed of (all in mole  
853 percentages): 25 *E. coli* PE, 5 *E. coli* CL, 50 *E. coli* PG, 19 eggPC and 1 DiD or 1 NBD-  
854 PE. For experiments in which EndoA1 was used, GUV composition was (all in mole %):  
855 45 DOPS, 24.5 DOPC, 30 DOPE and 0.5 DiD.

### 856 **Liposome-protein co-floatation**

857 For initial experiments, 40 nmol total lipid was incubated with 200 pmol FisB ECD for 1h  
858 at room temperature in a total volume of 100  $\mu$ l. 200  $\mu$ l of 60% Optiprep (iodixanol,  
859 Sigma-Aldrich) was added to the sample creating a 40% Optiprep solution. The sample  
860 was then layered at the bottom of a 5 mm x 41 mm Beckman ultracentrifuge tube  
861 (#344090) and overlaid with 200  $\mu$ l of 20% Optiprep and finally 150  $\mu$ l of buffer (Figure 4  
862 C). Liposome-bound proteins co-float to a light density, while unbound proteins pellet  
863 upon ultracentrifugation for 1.5 h at 48 krpm. Fractions were collected as shown in  
864 Figure 4C and the amount of recovered protein was determined by SDS-PAGE (Nu-  
865 PAPGE 12% Bis-tris gel, Thermo Fisher Scientific) stained with SYPRO™ Orange  
866 (Invitrogen).

## 867 **Liposome aggregation using absorbance**

868 SUVs were prepared by extrusion as described above but using a 50 nm polycarbonate  
869 filter. SUVs were composed of 50 mole % *E. coli* PG, 25 mole % *E. coli* PE, 20 mole %  
870 eggPC, 5 mole % *E. coli* CL. The absorbance at 350 nm of 50  $\mu$ M total lipid was  
871 measured for 5 min, before addition of 1  $\mu$ M FisB ECD. Absorbance increases with  
872 increasing liposome aggregation due to increased scattering<sup>100</sup>.

## 873 **Filamentous *B. subtilis* cells to test for curvature-sensitive localization of FisB**

874 An overnight culture of BMB014 was diluted into fresh CH medium<sup>101</sup> to OD<sub>600</sub>=0.05. 1  
875 mM IPTG and 20 mM xylose were added to induce the expression of GFP-FisB and  
876 MciZ, respectively. The latter inhibits cytokinesis<sup>68</sup>. The culture was grown at 37°C for  
877 30 min before 3-5  $\mu$ l of cells were transferred onto a 3% agar pad also containing 1 mM  
878 IPTG and 20 mM xylose. Cells were grown on the agar pad for 2h at 37°C prior to  
879 imaging. GFP-FisB foci were detected using the ImageJ plugin TrackMate as described  
880 above. Radii of the inner and outer edges were determined by manually fitting a circle to  
881 the cells using ImageJ.

## 882 **Determination of binding constants**

883 For determination of binding constants, the floatation protocol was slightly modified.  
884 Varying amounts of lipids were incubated with 100 nM iFluor555-FisB ECD for 1 h at  
885 room temperature in a total volume of 100  $\mu$ l. Density gradients were created as before  
886 using Optiprep (iodixanol), however only 2 fractions were collected (Figure 5H). The  
887 protein concentration in fraction A was too small to be quantified by SDS-PAGE.  
888 Therefore, the sample was concentrated by trichloroacetic acid (TCA) precipitation.  
889 Briefly, 50  $\mu$ l of TCA was added to fraction A and incubated for 30 min at 4°C. The  
890 sample was spun at 14 krpm in an Eppendorf microfuge for 5 min. The pellet was  
891 washed twice with ice-cold acetone and subsequently dried for 10 min in a 95°C heating  
892 block. 10  $\mu$ l of 2X SDS sample buffer was added to the dried pellet and the sample was  
893 boiled for 10 min at 95°C and loaded on a 12% bis-tris gel. The amount of recovered  
894 protein was determined by fluorescence intensity of the labeled FisB ECD band on the  
895 gel using a Typhoon FLA 9500 (GE Healthcare). The dissociation constant  $K_d$  was  
896 determined following ref. 102. Titration curves were fitted to:

$$897 \quad f_b = \frac{K[L]}{1+K[L]}, \quad (1)$$

898 where  $f_b$  is the fraction of bound protein and  $K$  the apparent association constant ( $K =$   
899  $1/K_d$ ). Eq. (1) assumes that the total lipid concentration  $[L]$  is much larger than the  
900 concentration of bound protein, a condition satisfied in our experiments for  $[L] > 10^{-7}$   
901 M.

## 902 **Image analysis**

903 To estimate the fraction of cells that have undergone membrane fission at a particular  
904 time after sporulation was initiated by nutrient downshift, cells were labeled with TMA-  
905 DPH (see "Live-cell fluorescence microscopy of *B. subtilis*" above). The dye labels the  
906 forespore contours intensely before membrane fission, as it has access to three  
907 membranes in close proximity that cannot be resolved (forespore, engulfment, and  
908 mother cell membranes). After membrane fission, the dye dimly labels forespore

909 contours (see S1 Appendix Fig. 1 for examples and quantification). Due to the clear  
910 separation between the two labeling patterns (S1 Appendix Fig. 1) cells can be scored  
911 visually, with 6-7% of cells having intermediate labeling that prevents categorization.  
912 Thus, we underestimate the percentage of cells that have undergone membrane fission  
913 by at most ~7%.

914 For the analyses shown in S1 Appendix Figs. 4A,B,C,E, and 9, we calculated the total  
915 intensity (sum of pixel values) inside the cell contour (indicated in yellow in Fig. S4A)  
916 using MicrobeJ<sup>103</sup>. Mean integrated auto-fluorescence (~1300 a.u) was calculated by  
917 analyzing in the same way an equivalent number of individual wild-type cells, imaged  
918 under identical conditions.

919 For the analyses shown in Figure 2 and S1 Appendix Fig. 4D, FisB foci were semi-  
920 automatically selected using SpeckleTrackerJ<sup>97</sup>. For each spot the sum of pixel values  
921 in a 6 × 6 pixel (0.5 μm × 0.5 μm) box around the center of the spot were calculated. For  
922 each corresponding cell the same operation was performed at a membrane area where  
923 no clusters were present and subtracted from the FisB cluster intensity.

#### 924 **Preparation of DNA Origami-based mEGFP standards**

925 These standards were prepared and characterized as described in<sup>44</sup>. Briefly, DNA  
926 "rods" consisted of six-helix-bundle DNA origami nanotubes. Rods carried varying  
927 numbers of single stranded "handle" sequences for DNA-conjugated fluorophore  
928 hybridization. A long scaffold DNA (p7308<sup>104</sup>) was folded into the desired shape by self-  
929 assembly with a six-fold molar excess of designed "staple strands" by heating and  
930 cooling cycles over an 18-hour period in a thermocycler (Bio-Rad). Excess staples  
931 were removed by PEG precipitation<sup>105</sup>, and DNA-conjugated fluorophores were  
932 hybridized to the DNA origami nanotubes by coincubation for 2 hours at 37°C. Finally,  
933 excess fluorophore-DNA conjugates were removed by a second PEG precipitation<sup>105</sup>.  
934 To estimate fluorophore labeling efficiency, standards designed to host 5 copies of  
935 Alexa Fluor 488 were similarly prepared. These standards were imaged on a TIRF  
936 microscope (Eclipse Ti, Nikon) until fully bleached. The photobleaching steps of the  
937 fluorescence traces were fit to a binomial function to estimate the labeling efficiency to  
938 be ~80% (95% CI = 76%-84%).

#### 939 **Quantitative Western Blot**

940 mYFP was cloned into pVS001 (His<sub>6</sub>-Sumo-mYFP) and purified using affinity  
941 chromatography. For immunoblotting, cells in 100 ml sporulation medium were pelleted  
942 and the supernatant removed. The pellets were suspended in ice-cold lysis buffer  
943 (pH=7.5; 50 mM HEPES, 100 mM KCl, 3 mM MgCl<sub>2</sub>, 1 mM EGTA, 0.1% Triton X-100, 1  
944 mM DTT, 1 mM PMSF, with one complete protease inhibitor tablet (Roche) to a final  
945 volume of 300 μl, and then we added 0.3 g acid-washed glass beads (425-600 μm,  
946 Sigma). After adding 150 μl boiling sample buffer (250 mM Tris-HCl, pH 6.8, 50%  
947 glycerol, 3.58 μM β-mercaptoethanol, 15% SDS, and 0.025% Bromophenol Blue),  
948 samples were incubated at 100°C for 5 min. Samples were centrifuged at 14,000 rpm in  
949 a desktop centrifuge at room temperature for 10 min and stored at -80°C. The blots  
950 were probed with peroxidase-conjugated anti-GFP antibody (ab13970). Images were  
951 scanned and quantified using ImageJ.

952

953

## 954 **ACKNOWLEDGEMENTS**

955 We thank members of the Karatekin and Rudner laboratories for stimulating  
956 discussions. This work was supported by National Institute of General Medical Sciences  
957 and National Institute of Neurological Disorders and Stroke of the National Institutes of  
958 Health (NIH) under award numbers R01GM114513 and R01NS113236 (to EK),  
959 DP2GM114830 and R01GM132114 (to CL). The content is solely the responsibility of  
960 the authors and does not necessarily represent the official views of the National  
961 Institutes of Health. We thank Vladimir Polejaev and Jeorg Nikolaus (directors of the  
962 Yale West Campus Imaging Core), and Josh Lees (Yale Center for Cellular and  
963 Molecular Imaging Electron Microscopy Facility) for their help with imaging, Karin  
964 Reinisch in whose laboratory work by FH was carried out, Daniel R. Zeigler (Bacillus  
965 Genetic Stock Center) for helpful advice, and Alexander J. Meeske for some of the  
966 strains used in this study. NDW was supported by a NIH training grant (T32-EB09941).  
967 We gratefully acknowledge a Yale University Predoctoral Fellowship to MB. This work  
968 was supported in part by the National Science Foundation, through the Center for the  
969 Physics of Biological Function (PHY-1734030). AM-C acknowledges support from the  
970 Spanish MECED through the program Ayudas para la Formación de Profesorado  
971 Universitario (FPU), Grant No. FPU16/0256. We are grateful to Aurelien Roux (U.  
972 Genève) for the generous gift of Atto395-EndoA1.

973

## 974 **AUTHOR CONTRIBUTIONS**

975 AL, MB, VS, and EK conceived the study. AL and MB performed experiments whose  
976 results are shown in the main figures. AA (Fig. S10), FH (Fig. 5, 7, S8), VS (Fig. S3)  
977 performed additional experiments. NDW and CL developed the DNA-origami  
978 fluorescence calibration method and contributed to the data in Fig. 2. CR, TD, and DR  
979 provided resources, training, and technical and conceptual input. They introduced EK,  
980 AL, MB and VS to *B. subtilis* and sporulation. EK and DR provided supervision and  
981 acquired funding. AMC and NW developed the model and wrote the corresponding  
982 sections. AL, MB, and EK and wrote the manuscript, with input from other co-authors.  
983 We thank Aurelien Roux for the generous gift of Atto395-EndoA1.

984

## 985 **CONFLICT OF INTEREST**

986 None.

987

## 988 **FIGURE LEGENDS**

989 **Figure 1. Membrane fission during sporulation is nearly always accompanied by**  
990 **accumulation of a FisB cluster at the fission site. A.** Vegetatively growing cells enter  
991 sporulation when nutrients become scarce. Asymmetric division creates a forespore  
992 (FS) and a mother cell (MC). The MC engulfs the FC in a phagocytosis-like event. At



993 the end of engulfment, a membrane neck connects the engulfment membrane to the  
994 rest of the MC (i). Fission of the neck (ii) releases the FS, now surrounded by two  
995 membranes, into the MC cytoplasm. Once the forespore becomes a mature spore, the  
996 MC lyses to release it. **B.** The membrane fission step shown in more detail. **C.** Detection  
997 of membrane fission. The lipophilic dye TMA-DPH does not fluoresce in the aqueous  
998 solution and crosses membranes poorly. If membrane fission has not yet taken place,  
999 the dye has access to the engulfment, FS and MC membranes, thus shows intense  
1000 labeling where these membranes are adjacent to one another (i). If fission has already  
1001 taken place, the dye labels internal membranes poorly (ii). **D.** Images show mGFP-FisB  
1002 (strain BAM003, native expression level) at indicated times during sporulation.  
1003 Membranes were visualized with TMA-DPH. Examples of sporulating cells with mGFP-  
1004 FisB enriched at the septum (1.5 h), forming dim mobile cluster (DMC; 2 h) and with a  
1005 discrete mGFP-FisB focus at the cell pole (intense spot at engulfment pole, ISEP, 3 h)  
1006 are highlighted with arrowheads. **E.** Similar to D, but using a strain (BAL003) that  
1007 expresses mGFP-FisB at lower levels in a  $\Delta fisB$  background. **F.** Time course of  
1008 membrane fission for wild-type cells,  $\Delta fisB$  cells, or  $\Delta fisB$  cells complemented with  
1009 mGFP-FisB expressed at native (BAM003) or low levels (BAL003). Lower expression of  
1010 mGFP-FisB leads to a delay in membrane fission kinetics. **G.** The percentage of cells  
1011 with an intense spot at the engulfment pole (ISEP) for low and native level expression of  
1012 mGFP-FisB as a function of time into sporulation. **H.** Correlation between percentage of  
1013 cells that have undergone fission and percentage of cells having an ISEP for all time  
1014 points shown in F and G. The fitted dashed line passing through the origin has slope  
1015 1.06 ( $R^2 = 0.9$ ). Scale bars represent 1  $\mu\text{m}$ .

1016 **Figure 2. Estimation of mEGFP-FisB copies at the engulfment pole at t=3 h using**  
1017 **DNA-origami calibration standards and mobility of FisB clusters.** **A.** Simplified  
1018 schematic of the DNA-origami-based mEGFP standards used in this study. Using DNA  
1019 origami, DNA rods bearing AF647 at both ends and the indicated numbers of mEGFP  
1020 molecules along the rod were designed. In the actual rods, the labeling efficiency was  
1021 found to be ~80%, so the actual copies of mEGFP per rod were 4, 20, 40, 56, and 80.  
1022 **B.** Representative wide field images of the DNA-origami-based mEGFP standards used  
1023 in this study. Bars are 1  $\mu\text{m}$ . **C.** Distributions of total fluorescence intensities (sum of  
1024 pixel values) for the intense spot at the engulfment pole (ISEP) and the dim, mobile  
1025 clusters (DMC). Background was defined individually for every cell where an ISEP or  
1026 DMC intensity measurement was performed. Examples are shown on the left. **D.** Total  
1027 fluorescence intensity (sum of pixel values) for DNA-origami rods as a function of  
1028 mEGFP copy numbers. The best fit line passing through the origin has slope 29.56  
1029 au/mEGFP ( $R^2 = 0.97$ ). The total intensity of the ISEP and DMCs correspond to ~40  
1030 and ~12 copies of mEGFP respectively. **E.** Mean-squared displacement (MSD) as a  
1031 function of delay time for DMCs (magenta) and ISEPs (blue). Cells expressing mGFP-  
1032 FisB (strain BAM003) were imaged using time-lapse microscopy. Forty-five cells from  
1033 10 different movies at t=2.5 hr and 30 cells from 10 different movies at t=3 hr after  
1034 nutrient downshift were analyzed. (See S1 Appendix Movie 1 for a representative single  
1035 bacterium at t=2.5 hrs showing several mobile DMCs and Movie 2 for a representative  
1036 single bacterium at t=3 hrs showing an immobile ISEP.) Fits to the initial 25 s (~10 % of

1037 delays) yielded  $D_{DMC} = 2.80 \pm 0.05 \times 10^3 \text{ nm}^2/\text{s}$  ( $\pm 95\%$  confidence interval,  $R^2 = 0.999$ ,  
1038 24 tracks) and  $D_{ISEP} = 2.80 \pm 0.51 \times 10 \text{ nm}^2/\text{s}$  ( $\pm 95\%$  confidence interval,  $R^2 = 0.850$ ,  
1039 25 tracks). **F.** Summary of FisB copy number and cluster mobility estimation.

1040 **Figure 3. Membrane fission is insensitive to membrane lipid composition. A.**  
1041 Pathways for membrane lipid synthesis in *B. subtilis*. Lipid synthetases responsible for  
1042 each step are highlighted in blue. **B.** Thin-layer chromatography (TLC) of the total lipid  
1043 extracts of wild-type and indicated lipid synthesis-deficient cells. Cells were collected 3  
1044 hrs after induction of sporulation by nutrient downshift. Phospholipid spots (PLs) were  
1045 visualized by staining with Molybdenum Blue spray reagent. Purified CL, PG, and PE  
1046 were used as standards to identify the PLs of *B. subtilis*. Arrows indicate locations to  
1047 which individual standards migrate. **C.** Membranes from cells of the indicated genetic  
1048 backgrounds were visualized with TMA-DPH at  $t=3\text{h}$ . The images are from cells  
1049 mounted on agarose pads containing sporulation medium. Bar,  $1 \mu\text{m}$ . **D.** Percentage of  
1050 cells from indicated strains that have undergone membrane fission as a function of time  
1051 after initiation of sporulation. For every strain, 150-220 cells from 3 independent  
1052 experiments were analyzed at the indicated times during sporulation. **E.** mGFP-FisB  
1053 (strain BAM003) treated with the squalene-synthase inhibitor zaragozic acid, imaged at  
1054  $t=3 \text{ h}$ . **F.** Cells expressing mYFP-FisB (low expression levels) in either wild type  
1055 (BAL002) or in a CL deficient strain (BAL037) at  $t=3\text{h}$ . Membranes were visualized with  
1056 the fluorescent dye TMA-DPH. Examples of sporulating cells with a discrete mYFP-FisB  
1057 focus at the cell pole (ISEP) are highlighted (white arrows). Foci were semi-  
1058 automatically selected with SpeckletrackerJ<sup>97</sup>. **G.** The percentage of cells with an  
1059 intense spot at engulfment pole for wild-type (BAL002) or cardiolipin-deficient (BAL037)  
1060 mYFP-FisB expressing cells at  $t=3\text{h}$  (low expression). For each strain, 150-220 cells  
1061 from 3 independent experiments were analyzed. **H.** Distributions of total fluorescence  
1062 intensities (sum of pixel values) at ISEP for wild-type (BAL002) or cardiolipin-deficient  
1063 (BAL037) mYFP-FisB cells at 3hr into sporulation. For every strain, 150 ISEPs were  
1064 analyzed. Scale bars are  $1 \mu\text{m}$ .

1065 **Figure 4. Binding of FisB ECD to acidic lipids. A.** Domain structure of FisB and its  
1066 His<sub>6</sub>-tagged extracytoplasmic domain (ECD) used in floatation experiments. **B.**  
1067 Predicted model of FisB<sup>44-225</sup> comprising most of the ECD<sup>57</sup>, schematically attached to  
1068 the membrane. **C.** Schematic of the floatation assay. Liposomes (40 nmol total lipid)  
1069 and FisB ECD (200 pmol) were incubated for 1 hour (total volume of 100  $\mu\text{l}$ ) at room  
1070 temperature and layered at the bottom of an iodixanol density gradient. Upon  
1071 ultracentrifugation, liposomes float to the top interface, whereas unbound protein  
1072 remains at the bottom. Four fractions were collected as indicated and analyzed by SDS-  
1073 PAGE. **D.** SYPRO orange stained gel of FisB ECD incubated with liposomes containing  
1074 45 mole % CL. The percentage of recovered protein is determined by comparing the  
1075 intensity of the band in fraction B to the input band intensity. **E.** Indistinguishable  
1076 amounts of FisB ECD are recovered when FisB ECD is incubated with liposomes  
1077 containing different acidic lipid species as long as the charge density is similar. CL30,  
1078 PG60, PS60 indicate liposomes containing 30 mole % CL, 60 mole % PG and 60 mole  
1079 % PS, respectively. CL carries 2 negative charges, whereas PG and PS carry one each.  
1080 The rest of the liposome composition is PC. **F.** Fraction of liposome-bound iFluor555-  
1081 labeled FisB ECD (iFluor555-FisB ECD, 100 nM) recovered after floatation as a function

1082 of lipid concentration. Titration curves were fit to  $f_b = K[L]/(1 + K[L])$ , where  $f_b$  is the  
1083 bound fraction of protein,  $[L]$  is the total lipid concentration (assumed to be  $\gg$  [protein  
1084 bound]), and  $K = 1/K_d$  the apparent association constant, and  $K_d$  is the apparent  
1085 dissociation constant. **G.** Best fit values for  $K_d$  were 1.0  $\mu\text{M}$  for CL (95% confidence  
1086 interval, CI=0.7-2.1  $\mu\text{M}$ ) and 3.6  $\mu\text{M}$  for PG (CI=2.8-5.0  $\mu\text{M}$ ), respectively. iFluor555-  
1087 FisB ECD (100 nM) was incubated with  $10^{-8}$  to  $10^{-4}$  M lipids for 1 h at room temperature  
1088 before flotation. Liposomes contained 45 mole % of CL or PG and 55% PC.

1089 **Figure 5. FisB mutants selectively impaired in oligomerization and membrane**  
1090 **binding.** **A.** Mutated residues shown on the FisB domain structure. **B.** Kyle-Doolittle  
1091 hydrophobicity profile of the FisB sequence for wild-type (WT), FisB K168D,K170E  
1092 (FisB<sup>KK</sup>), and FisB G175A,I176S, I195T, I196S (FisB<sup>GIII</sup>) mutants. **C.** Mutations shown  
1093 on the predicted model<sup>57</sup> of FisB<sup>44-225</sup>. Residue conservation (top) and electrostatic  
1094 potential (bottom) are mapped onto the structure. **D.** Western blot of cell lysates from *E.*  
1095 *coli* cells expressing FisB-ECD<sup>WT</sup>, FisB-ECD<sup>GIII</sup>, or FisB-ECD<sup>KK</sup>, probed with an anti-  
1096 histidine antibody. High molecular weight bands in the WT and KK lanes are largely  
1097 absent in the GIII lane, indicating FisB<sup>GIII</sup> is less prone to forming oligomers. **E.** Size-  
1098 exclusion chromatography of FisB WT and the GIII and KK mutants. Intensities of high  
1099 and low molecular weight peaks are reversed for FisB WT and the GIII mutant, whereas  
1100 the KK mutant has a profile similar to WT. **F.** A fraction corresponding to the high-  
1101 molecular peak in E (indicated by \*) for FisB WT was collected and imaged using  
1102 negative-stain electron microscopy (EM), which revealed flexible, elongated structures  
1103  $\sim 50 \text{ nm} \times 10 \text{ nm}$ . **G.** A similar analysis for FisB<sup>GIII</sup> revealed more heterogeneous and  
1104 less stable structures. Scale bars in F, G are 50 nm. **H.** Schematic of the flotation  
1105 experiments to determine the apparent affinity of FisB mutants for liposomes containing  
1106 acidic lipids. Experiments and analyses were carried out as in Figure 4, except only two  
1107 fractions were collected. iFluor555-FisB ECD (100 nM) was incubated with  $10^{-8}$  to  $10^{-4}$  M  
1108 lipids for 1 h at room temperature before flotation. Liposomes contained 45 mole % of  
1109 CL and 55% PC. **I.** Fraction of protein bound to liposomes as a function of total lipid  
1110 concentration. Data was fitted to a model as in Figure 4F. The data and fit for FisB WT  
1111 is copied from Figure 4F for comparison. **J.** Best fit values for  $K_d$  were 1.0  $\mu\text{M}$  for WT  
1112 (95% confidence interval, CI=0.7-2.1  $\mu\text{M}$ ), 9.1  $\mu\text{M}$  for KK (CI=6.5-15.3  $\mu\text{M}$ ), and 1.6 for  
1113 GIII (CI=0.9-5.1  $\mu\text{M}$ ), respectively.

1114 **Figure 6. FisB clustering and binding to acidic lipids are both required for ISEP**  
1115 **formation and membrane fission.** **A.** Snapshots of sporulating  $\Delta fisB$  cells expressing  
1116 mYFP-FisB<sup>WT</sup> (BAL002), mYFP-FisB<sup>KK</sup> (BAL006), or mYFP-FisB<sup>GIII</sup> (BAL007), at low  
1117 levels. For each time point after downshifting to the sporulation medium, cell  
1118 membranes were labeled with TMA-DPH and images were taken both in the membrane  
1119 (left) and the YFP (right) channels. By  $t=2.5$  h, some foci at the engulfment pole (ISEP)  
1120 are visible for WT cells that have undergone membrane fission (red boxes), but not for  
1121 the KK or GIII mutants (white boxes). A small fraction of KK mutants (7.3%)  
1122 accumulated FisB at the engulfment pole and underwent membrane fission at  $t=3$ h.  
1123 Scale bars represent 1  $\mu\text{m}$ . **B.** Percentage of cells with an intense spot at the  
1124 engulfment membrane (ISEP) at  $t=3$  h into sporulation, for WT FisB, FisB<sup>KK</sup>, or FisB<sup>GIII</sup>.  
1125 For every strain, 200-300 cells from three independent experiments were analyzed at  
1126 the indicated times during sporulation. **C.** Distribution of background-corrected

1127 integrated intensities (sum of pixel values) of ISEP fluorescence for  $\Delta fisB$  cells  
1128 expressing mYFP-FisB<sup>WT</sup> or mYFP-FisB<sup>KK</sup>. The distributions are indistinguishable.  
1129 Since low-expression cells accumulate, on average,  $6 \pm 2$  FisB<sup>WT</sup> molecules at the ISEP  
1130 (Fig. S4D), so do FisB<sup>KK</sup> cells. 175 and 68 ISEPs were analyzed for WT and KK mutant  
1131 strains. **D.** Percentage of cells that have undergone membrane fission at the indicated  
1132 time points. (For every strain, 200-300 cells from 3 independent experiments were  
1133 analyzed at the indicated times during sporulation.)

1134 **Figure 7. *C. perfringens* FisB can substitute for *B. subtilis* FisB despite poor**  
1135 **sequence identity. A.** Heat-resistant colony forming units for  $\Delta fisB$  cells expressing *B.*  
1136 *subtilis* (BAL001) or *C. perfringens* FisB (BAL005) at native levels, presented as a  
1137 percentage of the WT sporulation efficiency. Results are shown as means  $\pm$  SD for  
1138 three replicates per condition. **B.** Snapshot of  $\Delta fisB$  cells expressing mEGFP-  
1139 FisB<sup>*C. perfringens*</sup>. Aliquots were removed at the indicated times, membranes labeled with  
1140 TMA-DPH, and both the TMA-DPH and the EGFP channels imaged after mounting into  
1141 agar pads. White boxed areas are shown on an expanded scale in yellow boxes.  
1142 Arrows indicate cells with ISEP that have undergone membrane fission. Bar, 1  $\mu$ m. **C.**  
1143 Percentage of cells that have undergone membrane fission as a function of sporulation  
1144 time for wild-type cells,  $\Delta fisB$  cells,  $\Delta fisB$  cells expressing *B. subtilis* mEGFP-FisB at  
1145 native levels, or  $\Delta fisB$  cells expressing mEGFP-FisB<sup>*C. perfringens*</sup>. The plots for the first  
1146 three conditions are reproduced from Figure 1F for comparison. **D.** Distribution of  
1147 background-corrected total fluorescence intensity of ISEP for  $\Delta fisB$  cells expressing  
1148 mEGFP-FisB<sup>*C. perfringens*</sup> or mEGFP-FisB<sup>*B. subtilis*</sup> at native levels. From the calibration in  
1149 Figure 2D, we estimate  $9 \pm 7$  FisB<sup>*C. perfringens*</sup> per ISEP. The distribution for mEGFP-  
1150 FisB<sup>*B. subtilis*</sup> is reproduced from Figure 2C for comparison. (150 and 93 ISEPs were  
1151 analyzed for mEGFP-FisB<sup>*B. subtilis*</sup> and mEGFP-FisB<sup>*C. perfringens*</sup>, respectively.) **E.**  
1152 Percentage of cells with ISEP, for  $\Delta fisB$  cells expressing mEGFP-FisB<sup>*C. perfringens*</sup> or  
1153 mEGFP-FisB<sup>*B. subtilis*</sup>. (For each strain, 200-300 cells from 3 independent experiments  
1154 were analyzed.) **F.** Percentage of cells that have undergone membrane fission at  $t=3$  h  
1155 vs. the percentage of cells with ISEP at the same time point, for the conditions  
1156 indicated. There is a nearly perfect correlation between these two quantities (the  
1157 dashed line is a best-fit,  $y = 1.03x$ ,  $R^2 = 0.96$ ).

1158 **Figure 8. FisB does not sense or induce membrane curvature. A.** FisB ECD does  
1159 not induce deformation of GUV membranes. Left: GUVs incubated with 2  $\mu$ M iFluor555-  
1160 labeled FisB ECD did not show any tubulation or invagination of the GUV membrane.  
1161 GUVs were composed of (in mole %: 25 *E. coli* PE, 5 *E. coli* CL, 50 *E. coli* PG, 19  
1162 eggPC, 1 NBD-PE). Right: incubation of 2  $\mu$ M endophilin A1 (EndoA1, labeled with  
1163 Atto395) with GUVs (45% DOPS, 24.5% DOPC, 30% DOPE and 0.5% DiD) resulted in  
1164 extensive tubulation of membranes, as reported previously<sup>22</sup>. The two proteins have  
1165 similar affinities for GUV membranes under these conditions (Figure 4F and ref. 106).  
1166 **B.** FisB ECD cannot deform deflated GUVs and its membrane localization is  
1167 independent of curvature. To avoid potential issues with high membrane tension  
1168 preventing membrane deformation, GUVs were deflated using osmotic stress, which  
1169 resulted in deflated GUVs with both negatively and positively curved regions. FisB  
1170 ECD bound to these GUVs was unable to induce any high-curvature deformations. The  
1171 intensity of iFluor555-FisB ECD along a membrane contour (proportional to coverage)  
1172 was plotted against membrane curvature in the corresponding region. There was no

1173 correlation between membrane curvature and FisB ECD coverage. **C.** FisB localization  
1174 does not depend on curvature in filamentous *B. subtilis* cells. GFP-FisB was expressed  
1175 under an inducible promoter during vegetative growth and cell division was blocked by  
1176 inducing expression of MciZ<sup>68</sup>. Cells grew into long flexible filaments that were bent to  
1177 varying degrees. The linear density of GFP-FisB spots (spots/ $\mu\text{m}$ ) was independent of  
1178 filament curvature. **D.** FisB ECD bridges GUV membranes. iFluor555-FisB ECD (100  
1179 nM) was incubated with GUVs (same composition as in A and B). Many GUVs were  
1180 found adhering to one another. iFluor555-FisB ECD signals were enhanced in the  
1181 adhesion patches, in particular at the rims. Intensity profiles along the highlighted  
1182 contours are shown below the examples. **E.** FisB ECD aggregates small liposomes.  
1183 Liposomes (in mole %: 25 *E. coli* PE, 5 *E. coli* CL, 50 *E. coli* PG, 19 eggPC, 50  $\mu\text{M}$  total  
1184 lipid) were incubated in the absence and presence of FisB ECD (unlabeled) and their  
1185 aggregation monitored by absorbance at 350 nm. FisB was added at 5 min (1  $\mu\text{M}$  final),  
1186 which caused the absorbance to increase, indicating increased liposome aggregation.

1187 **Figure 9. Modeling supports recruitment of FisB to membrane neck via**  
1188 **oligomerization without curvature sensing. A.** Left: Schematic of the late stages of  
1189 engulfment, when a small membrane neck connects the engulfment membrane to the  
1190 rest of the mother cell membrane. Right: Schematic of FisB accumulation at the fission  
1191 site. FisB freely moves around the engulfment membrane and other regions of the  
1192 mother cell membrane, forming clusters of up to  $\sim 12$  molecules. Cluster motions are  
1193 independent of lipid microdomains, flotillins, the cell-wall synthesis machinery, and  
1194 voltage or pH gradients. About 40 copies of FisB accumulate at the membrane neck in  
1195 an immobile cluster. Bottom: Modeled axisymmetric membrane neck of radius  $R$  and  
1196 length  $L$  connecting two membrane sheets. The uniform areal concentration of FisB in  
1197 the neck is  $\phi$ . **B.** Top: Equilibrium radius of the neck as a function of FisB trans homo-  
1198 oligomerization strength,  $a$ , for several values of neck length,  $L$ . Below a minimum  
1199 interaction strength, FisB cannot stabilize the neck and the neck opens. The horizontal  
1200 line is the radius corresponding to the minimum of the potential describing the trans  
1201 interaction,  $R = 2^{1/6}\sigma$  (Eq. 3). Bottom: Equilibrium FisB concentration in the neck as a  
1202 function of  $a$ . The horizontal line is  $\phi_{r_{\text{max}}} = 2/(3^{3/2}r_{\text{max}}^2)$ , the concentration of FisB at the  
1203 onset of in-plane crowding. Model parameters (see Eqs. 5 and 6):  $\kappa = 20 k_{\text{B}}T$  (ref. 107),  
1204  $\phi_0 = 100 \text{ FisB } \mu\text{m}^{-2}$ ,  $\gamma = 10^{-4} \text{ N m}^{-2}$  (ref. 108),  $\sigma_{\text{cis}} \approx 2.47 \text{ nm}$ ,  $\phi_{r_{\text{max}}} = 5 \times 10^4 \text{ FisB } \mu\text{m}^{-2}$ ,  
1205  $L = 40 \text{ nm}$ , and for the dot  $a \approx 10^4 k_{\text{B}}T \text{ nm}^2 \text{ FisB}^{-1}$ . For details, see S2 Appendix.

1206  
1207  
1208

## 1209 REFERENCES

- 1210 1. Haucke V, Kozlov MM. Membrane remodeling in clathrin-mediated endocytosis.  
1211 *J Cell Sci* **131**, (2018).  
1212 2. Campelo F, Malhotra V. Membrane fission: the biogenesis of transport carriers.  
1213 *Annu Rev Biochem* **81**, 407-427 (2012).  
1214 3. Ahmed I, Akram Z, Iqbal HMN, Munn AL. The regulation of Endosomal Sorting  
1215 Complex Required for Transport and accessory proteins in multivesicular body

- 1216 sorting and enveloped viral budding - An overview. *Int J Biol Macromol* **127**, 1-11  
1217 (2019).
- 1218 4. Jaumouille V, Waterman CM. Physical Constraints and Forces Involved in  
1219 Phagocytosis. *Front Immunol* **11**, 1097 (2020).
- 1220 5. Carlton JG, Jones H, Eggert US. Membrane and organelle dynamics during cell  
1221 division. *Nat Rev Mol Cell Biol* **21**, 151-166 (2020).
- 1222 6. Errington J. Regulation of endospore formation in *Bacillus subtilis*. *Nat Rev*  
1223 *Microbiol* **1**, 117-126 (2003).
- 1224 7. Higgins D, Dworkin J. Recent progress in *Bacillus subtilis* sporulation. *FEMS*  
1225 *Microbiol Rev* **36**, 131-148 (2012).
- 1226 8. Tan IS, Ramamurthi KS. Spore formation in *Bacillus subtilis*. *Environ Microbiol*  
1227 *Rep* **6**, 212-225 (2014).
- 1228 9. Rand RP, Parsegian VA. Mimicry and mechanism in phospholipid models of  
1229 membrane fusion. *Annu Rev Physiol* **48**, 201-212 (1986).
- 1230 10. Wong JY, Park CK, Seitz M, Israelachvili J. Polymer-cushioned bilayers. II. An  
1231 investigation of interaction forces and fusion using the surface forces apparatus.  
1232 *Biophys J* **77**, 1458-1468 (1999).
- 1233 11. Kozlovsky Y, Kozlov MM. Membrane fission: model for intermediate structures.  
1234 *Biophys J* **85**, 85-96 (2003).
- 1235 12. Bashkirov PV, Akimov SA, Evseev AI, Schmid SL, Zimmerberg J, Frolov VA.  
1236 GTPase cycle of dynamin is coupled to membrane squeeze and release, leading  
1237 to spontaneous fission. *Cell* **135**, 1276-1286 (2008).
- 1238 13. Kozlov MM, McMahon HT, Chernomordik LV. Protein-driven membrane stresses  
1239 in fusion and fission. *Trends Biochem Sci* **35**, 699-706 (2010).
- 1240 14. Ferguson SM, De Camilli P. Dynamin, a membrane-remodelling GTPase. *Nat*  
1241 *Rev Mol Cell Biol* **13**, 75-88 (2012).
- 1242 15. Schoneberg J, Lee IH, Iwasa JH, Hurley JH. Reverse-topology membrane  
1243 scission by the ESCRT proteins. *Nat Rev Mol Cell Biol* **18**, 5-17 (2017).
- 1244 16. Simunovic M, *et al.* Friction Mediates Scission of Tubular Membranes Scaffolded  
1245 by BAR Proteins. *Cell* **170**, 172-184 e111 (2017).
- 1246 17. Roux A, Cuvelier D, Nassoy P, Prost J, Bassereau P, Goud B. Role of curvature  
1247 and phase transition in lipid sorting and fission of membrane tubules. *EMBO J*  
1248 **24**, 1537-1545 (2005).
- 1249 18. Hatch AL, Gurel PS, Higgs HN. Novel roles for actin in mitochondrial fission. *J*  
1250 *Cell Sci* **127**, 4549-4560 (2014).
- 1251 19. Yang C, Svitkina TM. Ultrastructure and dynamics of the actin-myosin II  
1252 cytoskeleton during mitochondrial fission. *Nat Cell Biol* **21**, 603-613 (2019).
- 1253 20. Lacy MM, Ma R, Ravindra NG, Berro J. Molecular mechanisms of force  
1254 production in clathrin-mediated endocytosis. *FEBS Lett* **592**, 3586-3605 (2018).
- 1255 21. Nickaen M, Berro J, Pollard TD, Slepchenko BM. Actin assembly produces  
1256 sufficient forces for endocytosis in yeast. *Mol Biol Cell* **30**, 2014-2024 (2019).
- 1257 22. Snead WT, *et al.* BAR scaffolds drive membrane fission by crowding disordered  
1258 domains. *J Cell Biol* **218**, 664-682 (2019).
- 1259 23. Doan T, *et al.* FisB mediates membrane fission during sporulation in *Bacillus*  
1260 *subtilis*. *Genes Dev* **27**, 322-334 (2013).

- 1261 24. Stragier P, Losick R. Molecular genetics of sporulation in *Bacillus subtilis*. *Annu*  
1262 *Rev Genet* **30**, 297-241 (1996).
- 1263 25. Gest H, Mandelstam J. Longevity of microorganisms in natural environments.  
1264 *Microbiol Sci* **4**, 69-71 (1987).
- 1265 26. Potts M. Desiccation tolerance of prokaryotes. *Microbiol Rev* **58**, 755-805 (1994).
- 1266 27. Ulrich N, Nagler K, Laue M, Cockell CS, Setlow P, Moeller R. Experimental  
1267 studies addressing the longevity of *Bacillus subtilis* spores - The first data from a  
1268 500-year experiment. *PLoS One* **13**, e0208425 (2018).
- 1269 28. Brown JK, Hovmøller MS. Aerial dispersal of pathogens on the global and  
1270 continental scales and its impact on plant disease. *Science* **297**, 537-541 (2002).
- 1271 29. Eichenberger P, *et al.* The sigmaE regulon and the identification of additional  
1272 sporulation genes in *Bacillus subtilis*. *J Mol Biol* **327**, 945-972 (2003).
- 1273 30. Mileykovskaya E, Dowhan W. Visualization of phospholipid domains in  
1274 *Escherichia coli* by using the cardiolipin-specific fluorescent dye 10-N-nonyl  
1275 acridine orange. *J Bacteriol* **182**, 1172-1175 (2000).
- 1276 31. Kawai F, Shoda M, Harashima R, Sadaie Y, Hara H, Matsumoto K. Cardiolipin  
1277 domains in *Bacillus subtilis* marburg membranes. *J Bacteriol* **186**, 1475-1483  
1278 (2004).
- 1279 32. Koppelman CM, Den Blaauwen T, Duursma MC, Heeren RM, Nanninga N.  
1280 *Escherichia coli* minicell membranes are enriched in cardiolipin. *J Bacteriol* **183**,  
1281 6144-6147 (2001).
- 1282 33. Kawai F, Hara H, Takamatsu H, Watabe K, Matsumoto K. Cardiolipin enrichment  
1283 in spore membranes and its involvement in germination of *Bacillus subtilis*  
1284 Marburg. *Genes Genet Syst* **81**, 69-76 (2006).
- 1285 34. Lewis RN, McElhaney RN. The physicochemical properties of cardiolipin bilayers  
1286 and cardiolipin-containing lipid membranes. *Biochim Biophys Acta* **1788**, 2069-  
1287 2079 (2009).
- 1288 35. Haines TH. A new look at Cardiolipin. *Biochim Biophys Acta* **1788**, 1997-2002  
1289 (2009).
- 1290 36. Ortiz A, Killian JA, Verkleij AJ, Wilschut J. Membrane fusion and the lamellar-to-  
1291 inverted-hexagonal phase transition in cardiolipin vesicle systems induced by  
1292 divalent cations. *Biophys J* **77**, 2003-2014 (1999).
- 1293 37. Khalifat N, Puff N, Bonneau S, Fournier JB, Angelova MI. Membrane deformation  
1294 under local pH gradient: mimicking mitochondrial cristae dynamics. *Biophys J* **95**,  
1295 4924-4933 (2008).
- 1296 38. Romantsov T, Helbig S, Culham DE, Gill C, Stalker L, Wood JM. Cardiolipin  
1297 promotes polar localization of osmosensory transporter ProP in *Escherichia coli*.  
1298 *Mol Microbiol* **64**, 1455-1465 (2007).
- 1299 39. Romantsov T, Stalker L, Culham DE, Wood JM. Cardiolipin controls the osmotic  
1300 stress response and the subcellular location of transporter ProP in *Escherichia*  
1301 *coli*. *J Biol Chem* **283**, 12314-12323 (2008).
- 1302 40. Lopez D, Koch G. Exploring functional membrane microdomains in bacteria: an  
1303 overview. *Curr Opin Microbiol* **36**, 76-84 (2017).
- 1304 41. Sharp MD, Pogliano K. An in vivo membrane fusion assay implicates SpoIIIE in  
1305 the final stages of engulfment during *Bacillus subtilis* sporulation. *Proc Natl Acad*  
1306 *Sci U S A* **96**, 14553-14558 (1999).

- 1307 42. Meyer P, Gutierrez J, Pogliano K, Dworkin J. Cell wall synthesis is necessary for  
1308 membrane dynamics during sporulation of *Bacillus subtilis*. *Mol Microbiol* **76**,  
1309 956-970 (2010).
- 1310 43. Doan T, *et al.* Novel secretion apparatus maintains spore integrity and  
1311 developmental gene expression in *Bacillus subtilis*. *PLoS Genet* **5**, e1000566  
1312 (2009).
- 1313 44. Williams ND, *et al.* DNA-Origami-Based Fluorescence Brightness Standards for  
1314 Convenient and Fast Protein Counting in Live Cells. *Nano Lett* **20**, 8890-8896  
1315 (2020).
- 1316 45. Guiziou S, *et al.* A part toolbox to tune genetic expression in *Bacillus subtilis*.  
1317 *Nucleic Acids Res* **44**, 7495-7508 (2016).
- 1318 46. Donovan C, Bramkamp M. Characterization and subcellular localization of a  
1319 bacterial flotillin homologue. *Microbiology* **155**, 1786-1799 (2009).
- 1320 47. Kunst F, *et al.* The complete genome sequence of the Gram-positive bacterium  
1321 *Bacillus subtilis*. *Nature* **390**, 249-256 (1997).
- 1322 48. Chernomordik LV, Kozlov MM. Mechanics of membrane fusion. *Nat Struct Mol*  
1323 *Biol* **15**, 675-683 (2008).
- 1324 49. Schmid SL, Frolov VA. Dynamin: functional design of a membrane fission  
1325 catalyst. *Annu Rev Cell Dev Biol* **27**, 79-105 (2011).
- 1326 50. Nishibori A, Kusaka J, Hara H, Umeda M, Matsumoto K.  
1327 Phosphatidylethanolamine Domains and Localization of Phospholipid Synthases  
1328 in *Bacillus subtilis* Membranes. *Journal of Bacteriology* **187**, 2163-2174 (2005).
- 1329 51. Good MC, Zalatan JG, Lim WA. Scaffold proteins: hubs for controlling the flow of  
1330 cellular information. *Science* **332**, 680-686 (2011).
- 1331 52. Langhorst MF, Reuter A, Stuermer CA. Scaffolding microdomains and beyond:  
1332 the function of reggie/flotillin proteins. *Cell Mol Life Sci* **62**, 2228-2240 (2005).
- 1333 53. López D, Kolter R. Functional microdomains in bacterial membranes. *Genes Dev*  
1334 **24**, 1893-1902 (2010).
- 1335 54. Sohlenkamp C, Geiger O. Bacterial membrane lipids: diversity in structures and  
1336 pathways. *FEMS Microbiology Reviews* **40**, 133-159 (2015).
- 1337 55. Oliver PM, Crooks JA, Leidl M, Yoon EJ, Saghatelian A, Weibel DB. Localization  
1338 of anionic phospholipids in *Escherichia coli* cells. *J Bacteriol* **196**, 3386-3398  
1339 (2014).
- 1340 56. Bogdanov M, Heacock PN, Dowhan W. Study of polytopic membrane protein  
1341 topological organization as a function of membrane lipid composition. *Methods*  
1342 *Mol Biol* **619**, 79-101 (2010).
- 1343 57. Ovchinnikov S, *et al.* Protein structure determination using metagenome  
1344 sequence data. *Science* **355**, 294-298 (2017).
- 1345 58. den Kamp JA, Redai I, van Deenen LL. Phospholipid composition of *Bacillus*  
1346 *subtilis*. *J Bacteriol* **99**, 298-303 (1969).
- 1347 59. Updegrove TB, Ramamurthi KS. Geometric protein localization cues in bacterial  
1348 cells. *Curr Opin Microbiol* **36**, 7-13 (2017).
- 1349 60. Simunovic M, Voth GA, Callan-Jones A, Bassereau P. When Physics Takes  
1350 Over: BAR Proteins and Membrane Curvature. *Trends in Cell Biology* **25**, 780-  
1351 792 (2015).



- 1352 61. Antony B. Mechanisms of membrane curvature sensing. *Annu Rev Biochem* **80**,  
1353 101-123 (2011).
- 1354 62. Baumgart T, Capraro BR, Zhu C, Das SL. Thermodynamics and mechanics of  
1355 membrane curvature generation and sensing by proteins and lipids. *Annu Rev*  
1356 *Phys Chem* **62**, 483-506 (2011).
- 1357 63. Sorre B, *et al.* Nature of curvature coupling of amphiphysin with membranes  
1358 depends on its bound density. *Proc Natl Acad Sci U S A* **109**, 173-178 (2012).
- 1359 64. Kjaerulff O, Brodin L, Jung A. The structure and function of endophilin proteins.  
1360 *Cell Biochem Biophys* **60**, 137-154 (2011).
- 1361 65. Chen Z, Zhu C, Kuo CJ, Robustelli J, Baumgart T. The N-Terminal Amphipathic  
1362 Helix of Endophilin Does Not Contribute to Its Molecular Curvature Generation  
1363 Capacity. *J Am Chem Soc* **138**, 14616-14622 (2016).
- 1364 66. Hohendahl A, *et al.* Structural inhibition of dynamin-mediated membrane fission  
1365 by endophilin. *Elife* **6**, (2017).
- 1366 67. Shi Z, Baumgart T. Membrane tension and peripheral protein density mediate  
1367 membrane shape transitions. *Nat Commun* **6**, 5974 (2015).
- 1368 68. Handler AA, Lim JE, Losick R. Peptide inhibitor of cytokinesis during sporulation  
1369 in *Bacillus subtilis*. *Mol Microbiol* **68**, 588-599 (2008).
- 1370 69. Renner LD, Eswaramoorthy P, Ramamurthi KS, Weibel DB. Studying  
1371 biomolecule localization by engineering bacterial cell wall curvature. *PLoS One* **8**,  
1372 e84143 (2013).
- 1373 70. Canham PB. Minimum Energy of Bending as a Possible Explanation of  
1374 Biconcave Shape of Human Red Blood Cell. *J Theor Biol* **26**, 61-& (1970).
- 1375 71. Helfrich W. Elastic Properties of Lipid Bilayers - Theory and Possible  
1376 Experiments. *Z Naturforsch C C* **28**, 693-703 (1973).
- 1377 72. Zhongcan OY, Helfrich W. Instability and Deformation of a Spherical Vesicle by  
1378 Pressure. *Phys Rev Lett* **59**, 2486-2488 (1987).
- 1379 73. Zhongcan OY, Helfrich W. Bending Energy of Vesicle Membranes - General  
1380 Expressions for the 1st, 2nd, and 3rd Variation of the Shape Energy and  
1381 Applications to Spheres and Cylinders. *Phys Rev A* **39**, 5280-5288 (1989).
- 1382 74. Seifert U, Langer SA. Viscous Modes of Fluid Bilayer-Membranes. *Europhys Lett*  
1383 **23**, 71-76 (1993).
- 1384 75. Seifert U. Configurations of fluid membranes and vesicles. *Adv Phys* **46**, 13-137  
1385 (1997).
- 1386 76. Ojkic N, López-Garrido J, Pogliano K, Endres RG. Cell-wall remodeling drives  
1387 engulfment during *Bacillus subtilis* sporulation. *Elife* **5**, (2016).
- 1388 77. Hernandez JM, Kreutzberger AJ, Kiessling V, Tamm LK, Jahn R. Variable  
1389 cooperativity in SNARE-mediated membrane fusion. *Proc Natl Acad Sci U S A*  
1390 **111**, 12037-12042 (2014).
- 1391 78. Mostafavi H, *et al.* Entropic forces drive self-organization and membrane fusion  
1392 by SNARE proteins. *Proc Natl Acad Sci U S A* **114**, 5455-5460 (2017).
- 1393 79. Wu Z, *et al.* Dilation of fusion pores by crowding of SNARE proteins. *Elife* **6**,  
1394 (2017).
- 1395 80. Stepanyants N, Macdonald PJ, Francy CA, Mears JA, Qi X, Ramachandran R.  
1396 Cardiolipin's propensity for phase transition and its reorganization by dynamin-

- 1397 related protein 1 form a basis for mitochondrial membrane fission. *Mol Biol Cell*  
1398 **26**, 3104-3116 (2015).
- 1399 81. Chernomordik LV, Kozlov MM, Melikyan GB, Abidor IG, Markin VS,  
1400 Chizmadzhev YA. The shape of lipid molecules and monolayer membrane  
1401 fusion. *Biochimica et Biophysica Acta (BBA) - Biomembranes* **812**, 643-655  
1402 (1985).
- 1403 82. Cullis PR, de Kruijff B, Verkleij AJ, Hope MJ. Lipid polymorphism and membrane  
1404 fusion. *Biochem Soc Trans* **14**, 242-245 (1986).
- 1405 83. Landajuela A, *et al.* Lipid Geometry and Bilayer Curvature Modulate  
1406 LC3/GABARAP-Mediated Model Autophagosomal Elongation. *Biophysical*  
1407 *journal* **110**, 411-422 (2016).
- 1408 84. Zeigler DR, *et al.* The origins of 168, W23, and other *Bacillus subtilis* legacy  
1409 strains. *J Bacteriol* **190**, 6983-6995 (2008).
- 1410 85. Youngman PJ, Perkins JB, Losick R. Genetic transposition and insertional  
1411 mutagenesis in *Bacillus subtilis* with *Streptococcus faecalis* transposon Tn917.  
1412 *Proc Natl Acad Sci U S A* **80**, 2305-2309 (1983).
- 1413 86. Spizizen J. TRANSFORMATION OF BIOCHEMICALLY DEFICIENT STRAINS  
1414 OF *BACILLUS SUBTILIS* BY DEOXYRIBONUCLEATE. *Proc Natl Acad Sci U S*  
1415 *A* **44**, 1072-1078 (1958).
- 1416 87. Schaeffer P, Millet J, Aubert JP. Catabolic repression of bacterial sporulation.  
1417 *Proc Natl Acad Sci U S A* **54**, 704-711 (1965).
- 1418 88. Sterlini JM, Mandelstam J. Commitment to sporulation in *Bacillus subtilis* and its  
1419 relationship to development of actinomycin resistance. *Biochem J* **113**, 29-37  
1420 (1969).
- 1421 89. Koo BM, *et al.* Construction and Analysis of Two Genome-Scale Deletion  
1422 Libraries for *Bacillus subtilis*. *Cell Syst* **4**, 291-305.e297 (2017).
- 1423 90. Schneider CA, Rasband WS, Eliceiri KW. NIH Image to ImageJ: 25 years of  
1424 image analysis. *Nat Methods* **9**, 671-675 (2012).
- 1425 91. Bogdanov M, Zhang W, Xie J, Dowhan W. Transmembrane protein topology  
1426 mapping by the substituted cysteine accessibility method (SCAM(TM)):  
1427 application to lipid-specific membrane protein topogenesis. *Methods* **36**, 148-171  
1428 (2005).
- 1429 92. Stratton BS, *et al.* Cholesterol Increases the Openness of SNARE-Mediated  
1430 Flickering Fusion Pores. *Biophys J* **110**, 1538-1550 (2016).
- 1431 93. Nikolaus J, Karatekin E. SNARE-mediated Fusion of Single Proteoliposomes  
1432 with Tethered Supported Bilayers in a Microfluidic Flow Cell Monitored by  
1433 Polarized TIRF Microscopy. *J Vis Exp*, (2016).
- 1434 94. Tinevez JY, *et al.* TrackMate: An open and extensible platform for single-particle  
1435 tracking. *Methods* **115**, 80-90 (2017).
- 1436 95. Tarantino N, *et al.* TNF and IL-1 exhibit distinct ubiquitin requirements for  
1437 inducing NEMO-IKK supramolecular structures. *J Cell Biol* **204**, 231-245 (2014).
- 1438 96. Huet S, Karatekin E, Tran VS, Fanget I, Cribier S, Henry JP. Analysis of transient  
1439 behavior in complex trajectories: application to secretory vesicle dynamics.  
1440 *Biophys J* **91**, 3542-3559 (2006).
- 1441 97. Smith MB, Karatekin E, Gohlke A, Mizuno H, Watanabe N, Vavylonis D.  
1442 Interactive, computer-assisted tracking of speckle trajectories in fluorescence

- 1443 microscopy: application to actin polymerization and membrane fusion. *Biophys J*  
1444 **101**, 1794-1804 (2011).
- 1445 98. Lacombe C, Lubochinsky B. Specific extraction of bacterial cardiolipin from  
1446 sporulating *Bacillus subtilis*. *Biochim Biophys Acta* **961**, 183-187 (1988).
- 1447 99. Angelova MI, Dimitrov DS. Liposome Electroformation. *Faraday Discuss* **81**, 303-  
1448 + (1986).
- 1449 100. Connell E, Scott P, Davletov B. Real-time assay for monitoring membrane  
1450 association of lipid-binding domains. *Anal Biochem* **377**, 83-88 (2008).
- 1451 101. Sterlini JM, Mandelstam J. Commitment to Sporulation in *Bacillus Subtilis* and Its  
1452 Relationship to Development of Actinomycin Resistance. *Biochem J* **113**, 29-+  
1453 (1969).
- 1454 102. Buser CA, Sigal CT, Resh MD, McLaughlin S. Membrane binding of myristylated  
1455 peptides corresponding to the NH2 terminus of Src. *Biochemistry* **33**, 13093-  
1456 13101 (1994).
- 1457 103. Ducret A, Quardokus EM, Brun YV. MicrobeJ, a tool for high throughput bacterial  
1458 cell detection and quantitative analysis. *Nat Microbiol* **1**, 16077 (2016).
- 1459 104. Douglas SM, Dietz H, Liedl T, Högberg B, Graf F, Shih WM. Self-assembly of  
1460 DNA into nanoscale three-dimensional shapes. *Nature* **459**, 414-418 (2009).
- 1461 105. Stahl E, Martin TG, Praetorius F, Dietz H. Facile and scalable preparation of pure  
1462 and dense DNA origami solutions. *Angew Chem Int Ed Engl* **53**, 12735-12740  
1463 (2014).
- 1464 106. Chen ZM, Atefi E, Baumgart T. Membrane Shape Instability Induced by Protein  
1465 Crowding. *Biophysical Journal* **111**, 1823-1826 (2016).
- 1466 107. Powers TR. Dynamics of filaments and membranes in a viscous fluid. *Rev Mod*  
1467 *Phys* **82**, (2010).
- 1468 108. Ojkic N, Lopez-Garrido J, Pogliano K, Endres RG. Bistable Forespore  
1469 Engulfment in *Bacillus subtilis* by a Zipper Mechanism in Absence of the Cell  
1470 Wall. *Plos Comput Biol* **10**, (2014).
- 1471

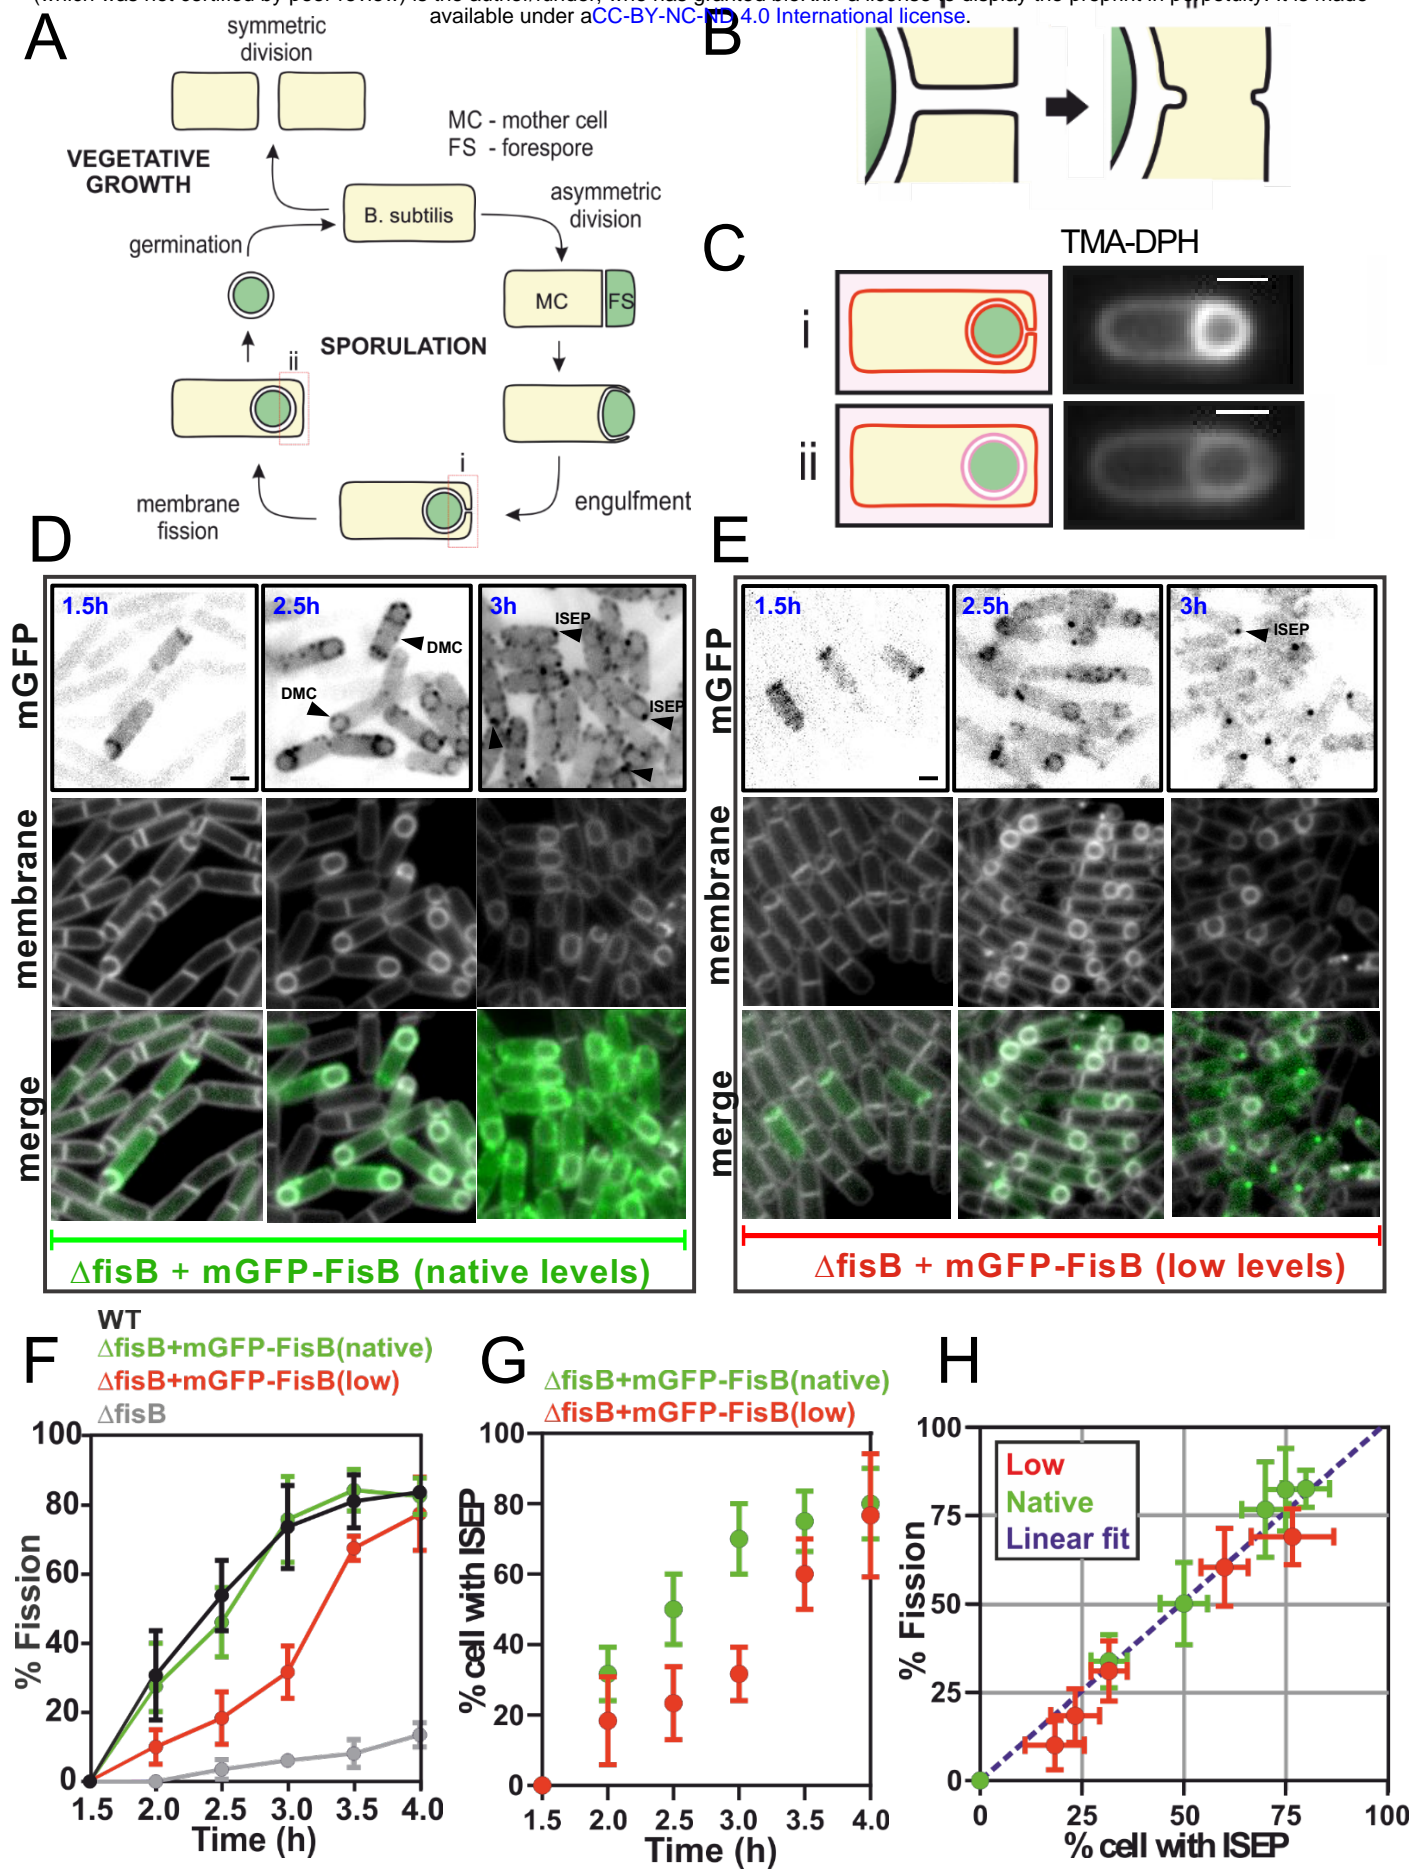

FIGURE 1

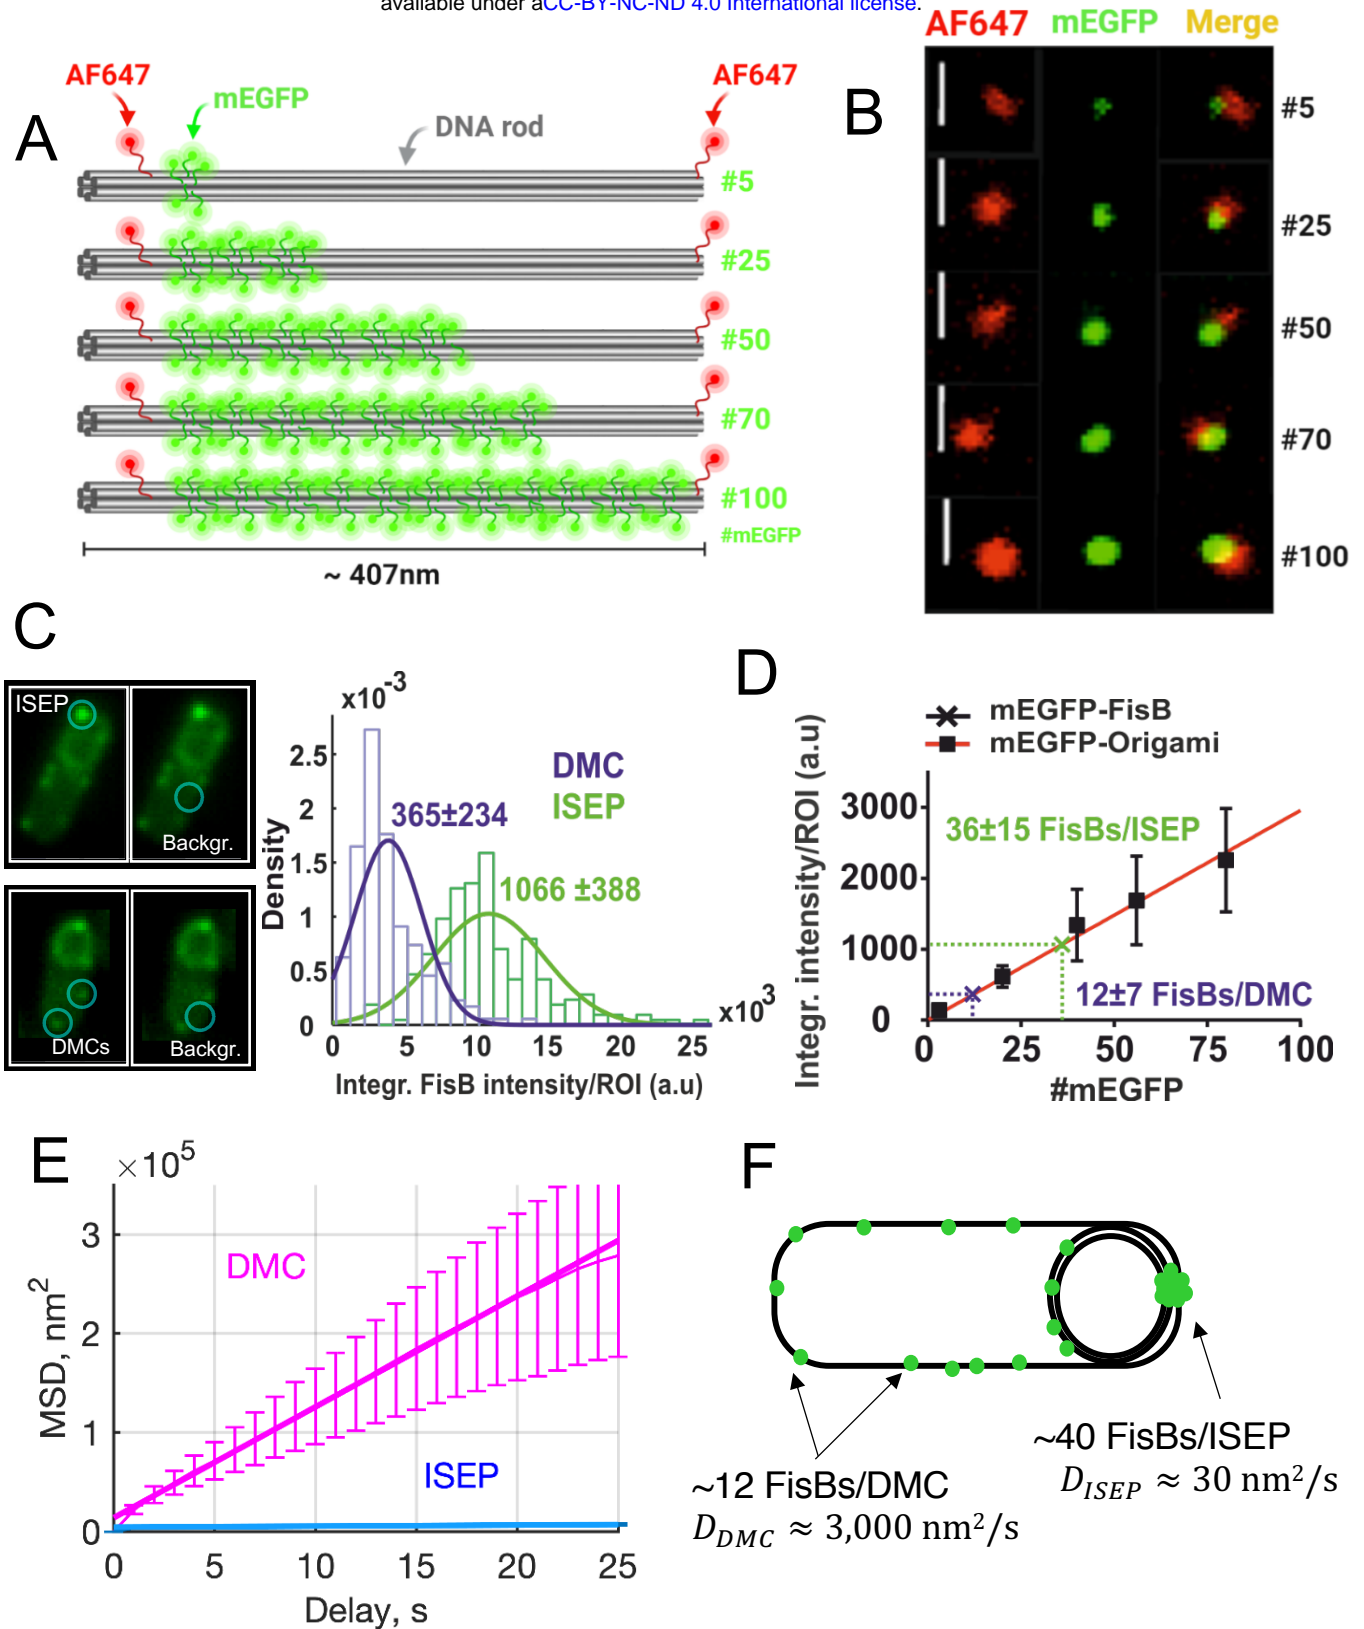

**FIGURE 2**

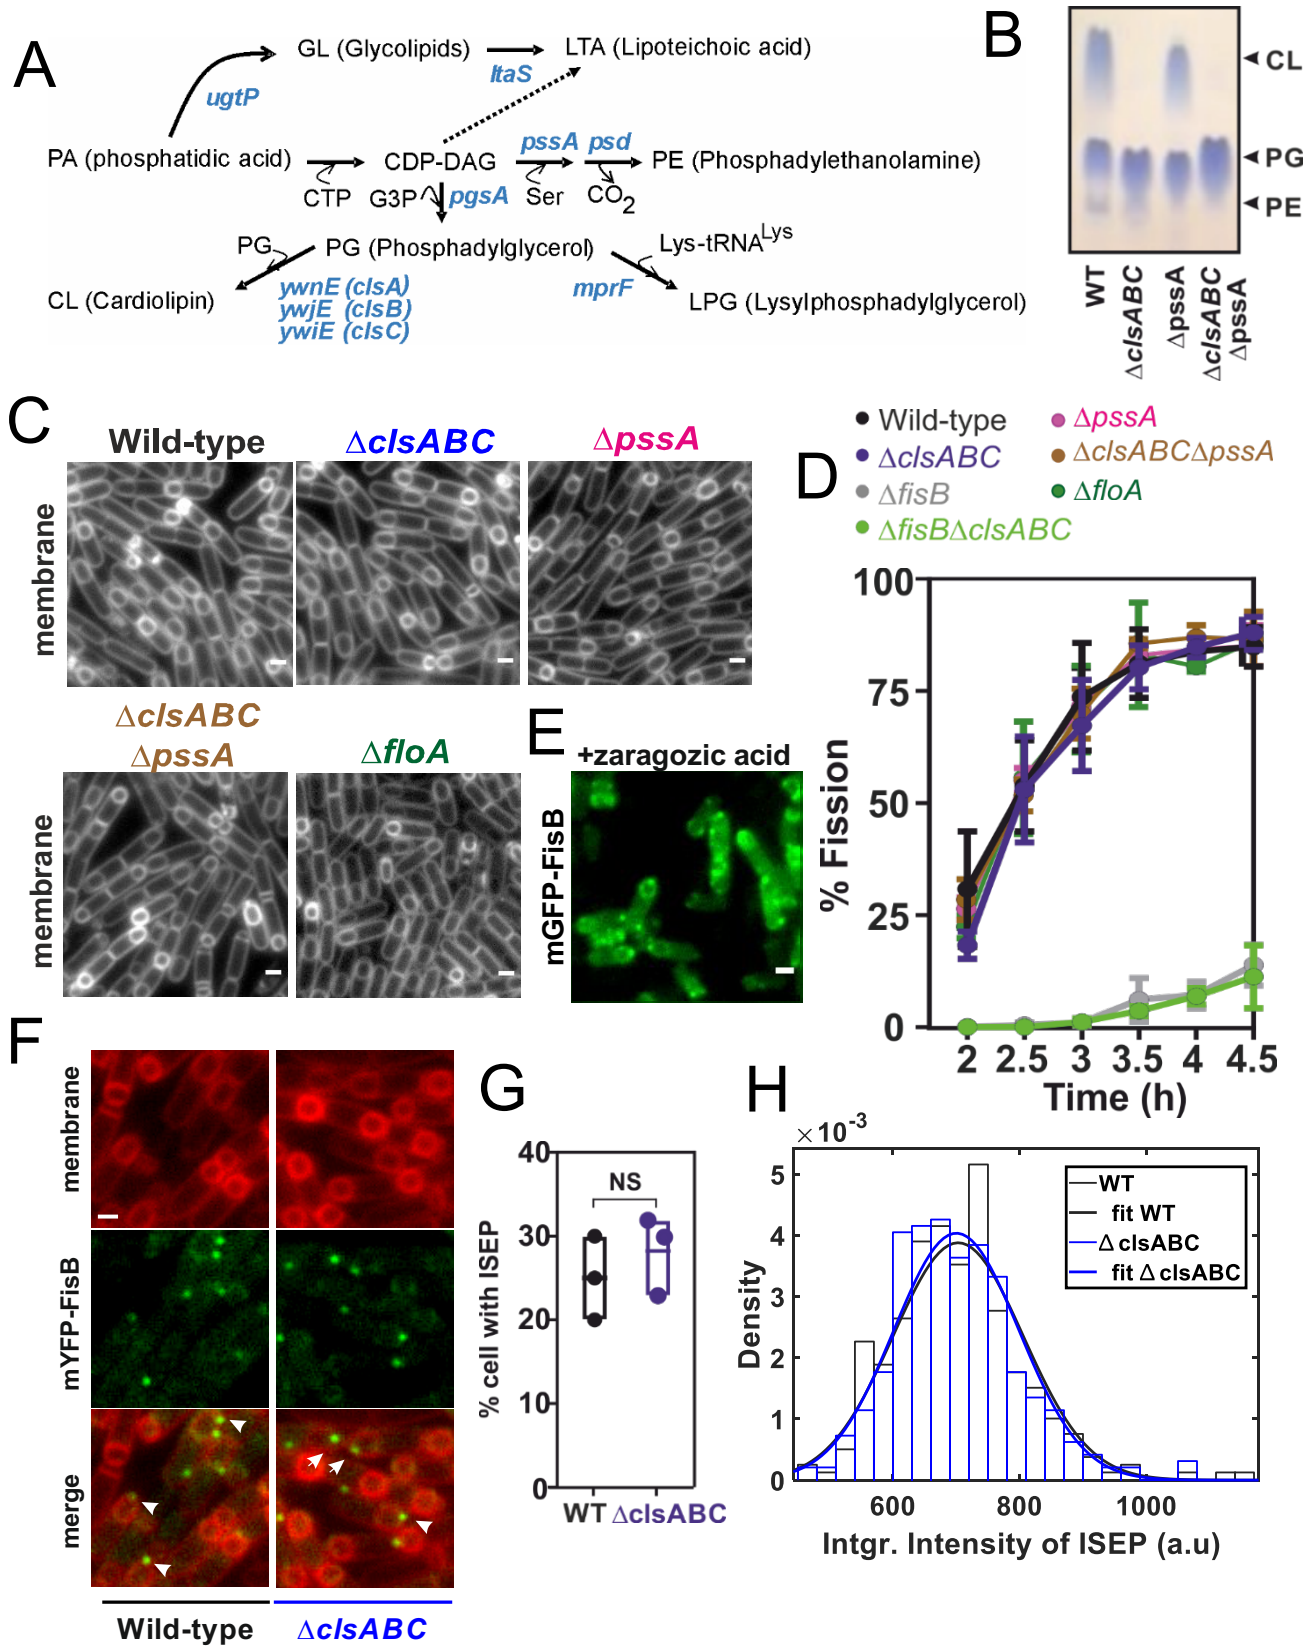

FIGURE 3

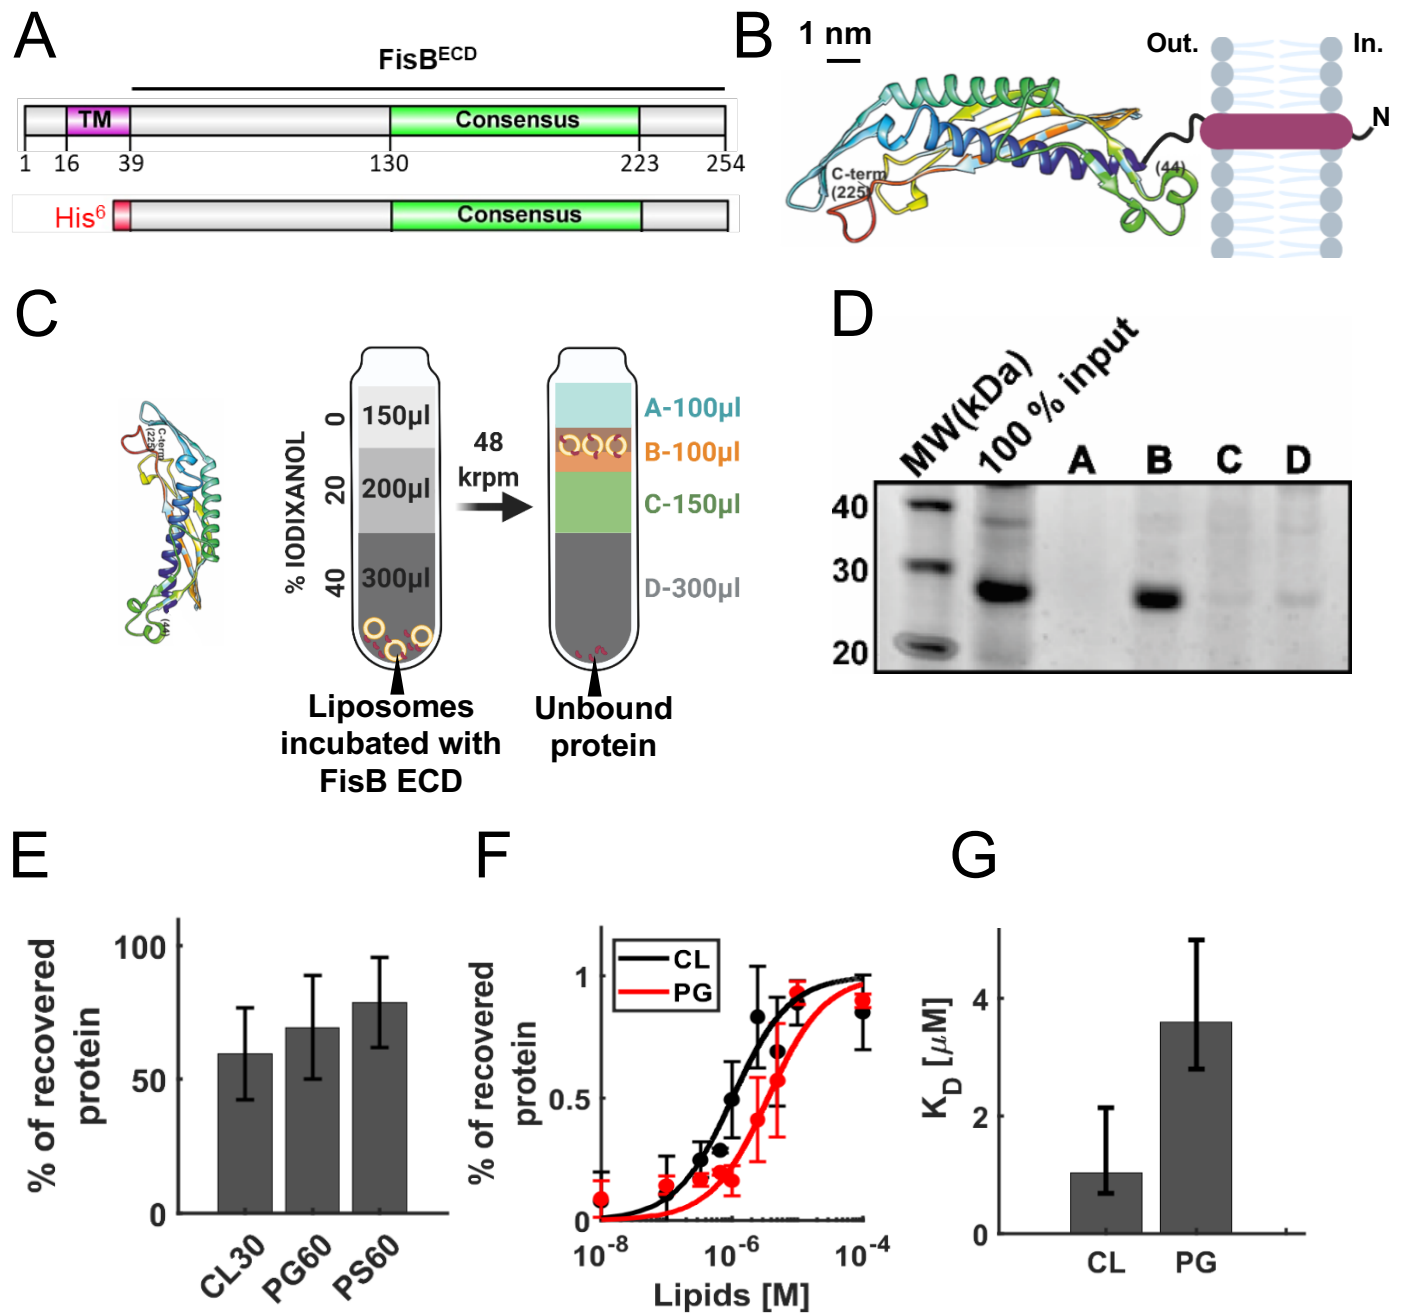

**FIGURE 4**

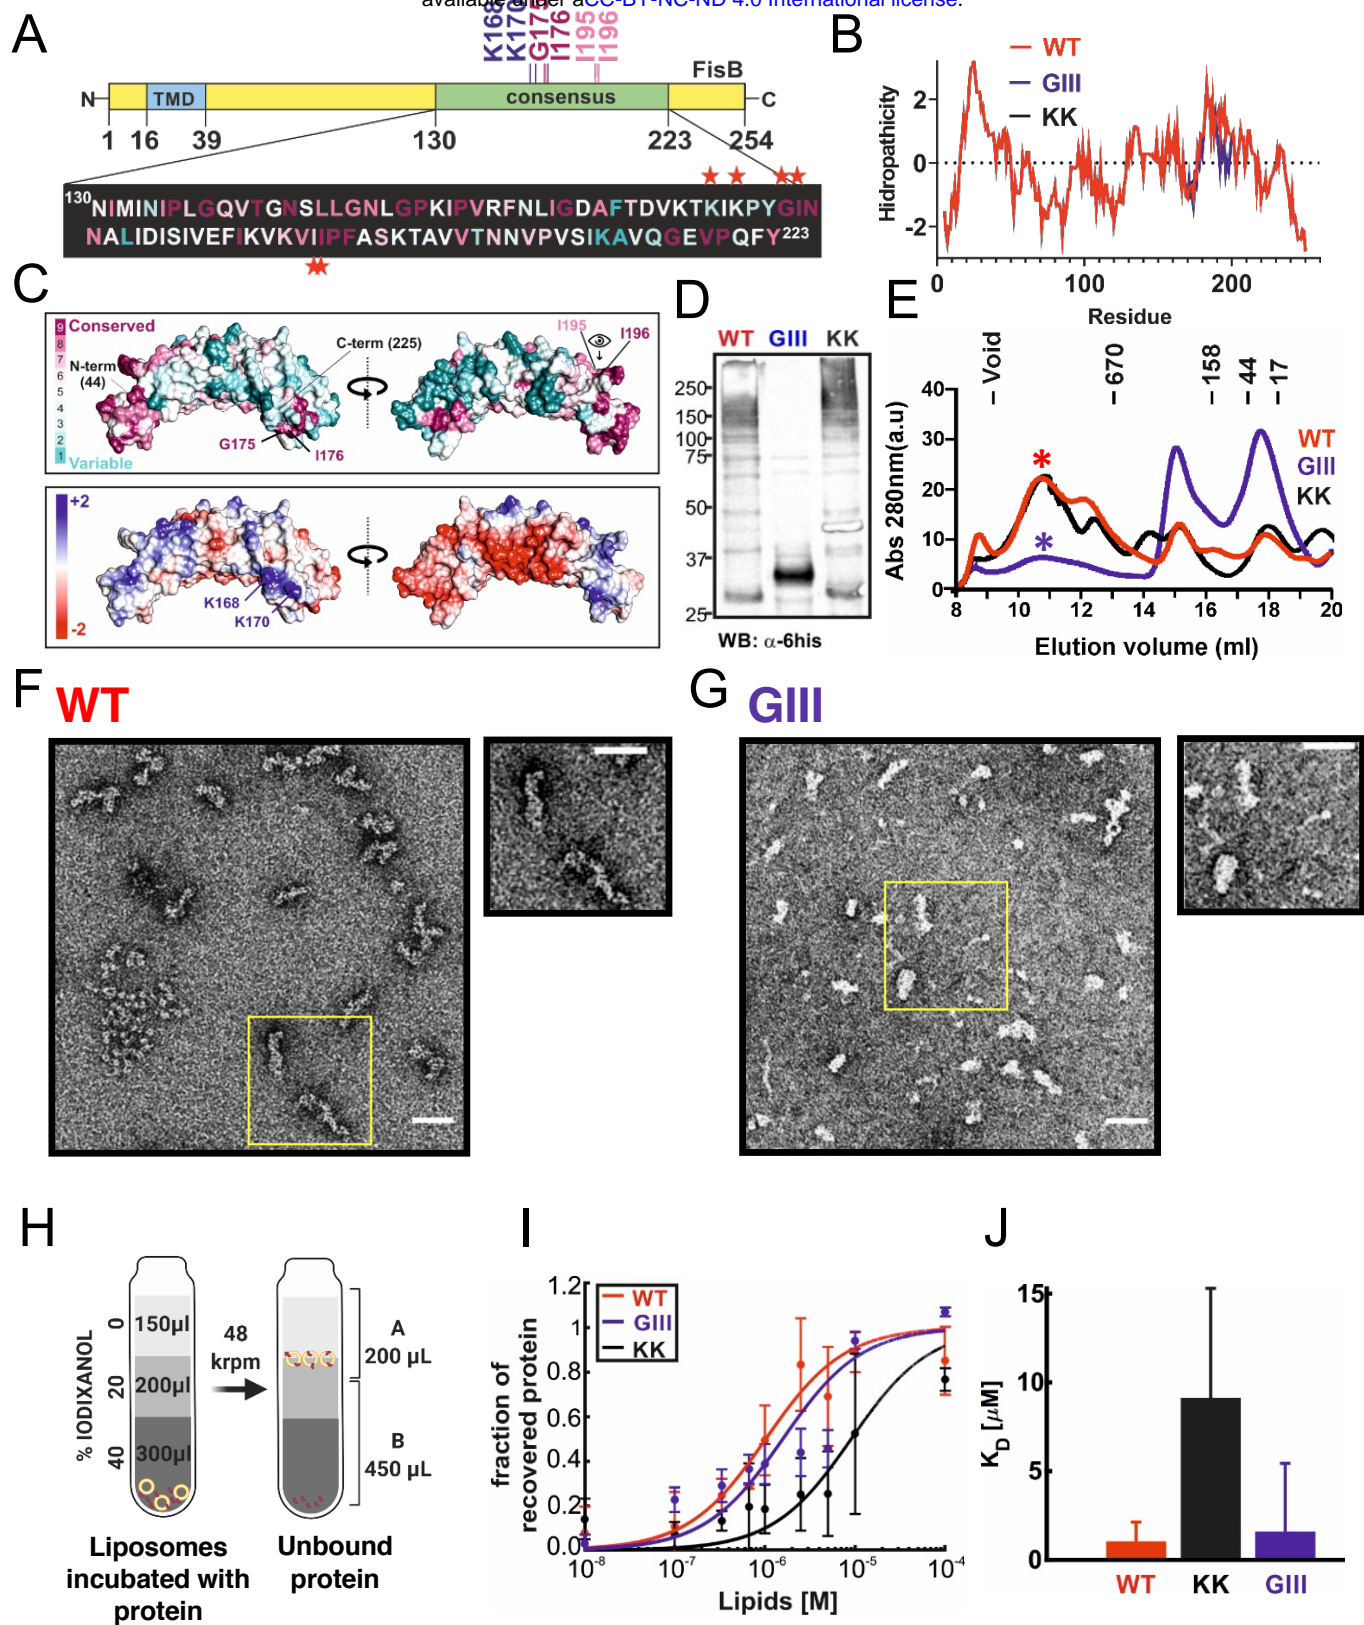

**FIGURE 5**



**A**

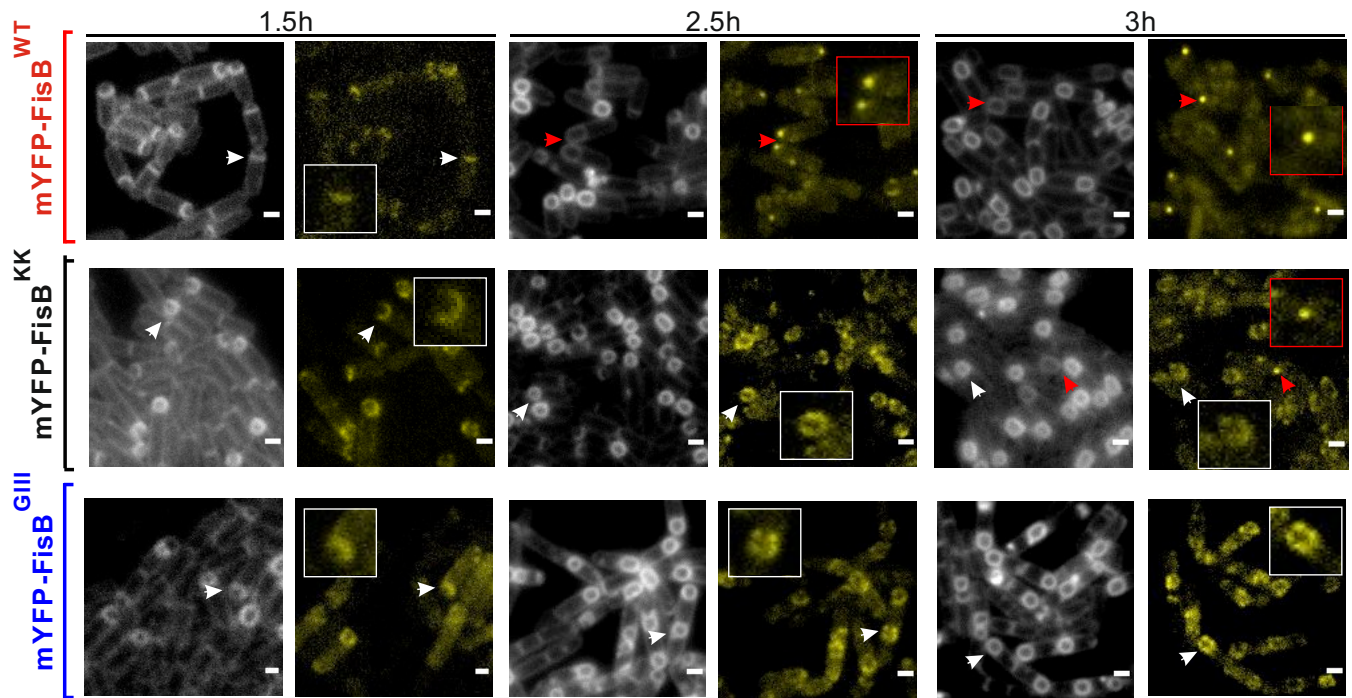

**B**

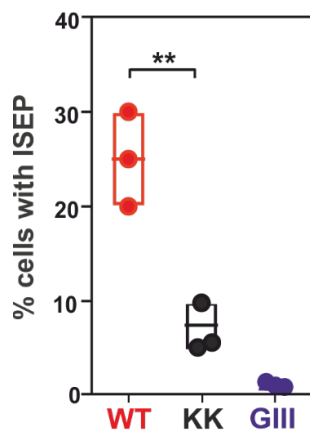

**C**

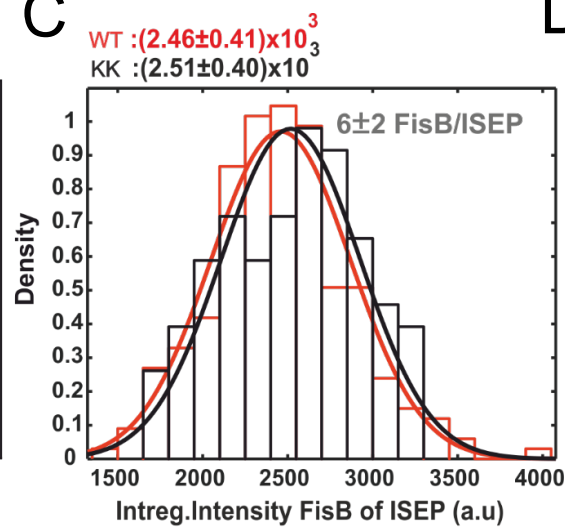

**D**

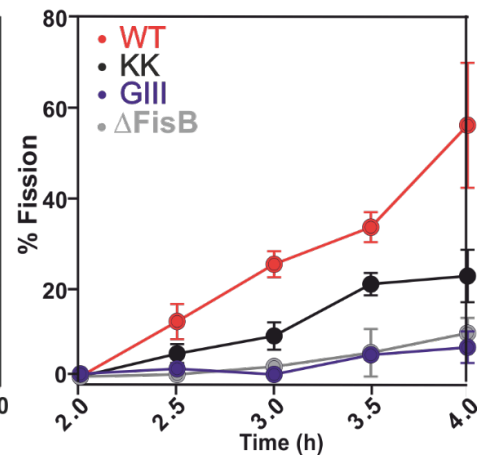

**FIGURE 6**

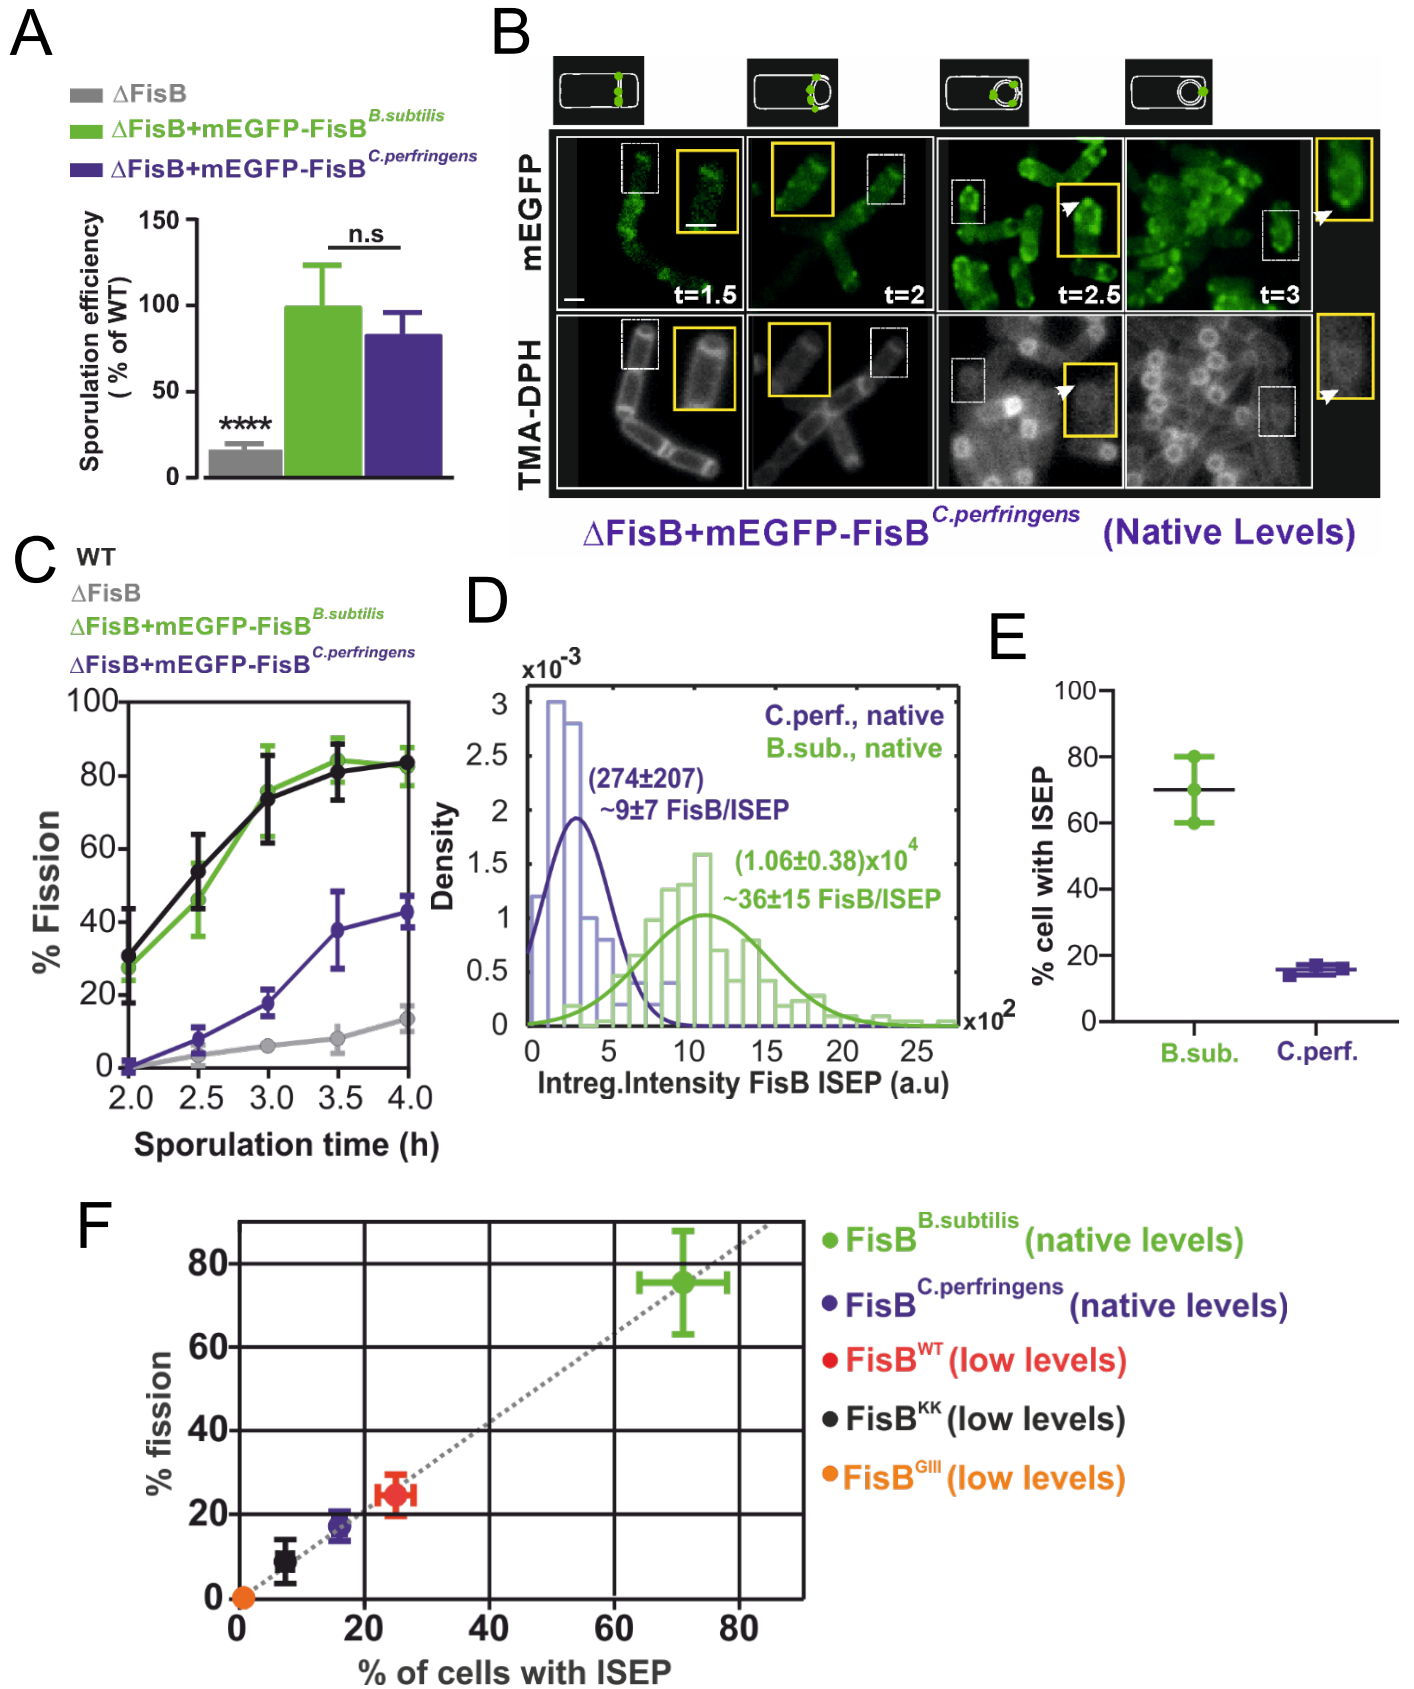

FIGURE 7

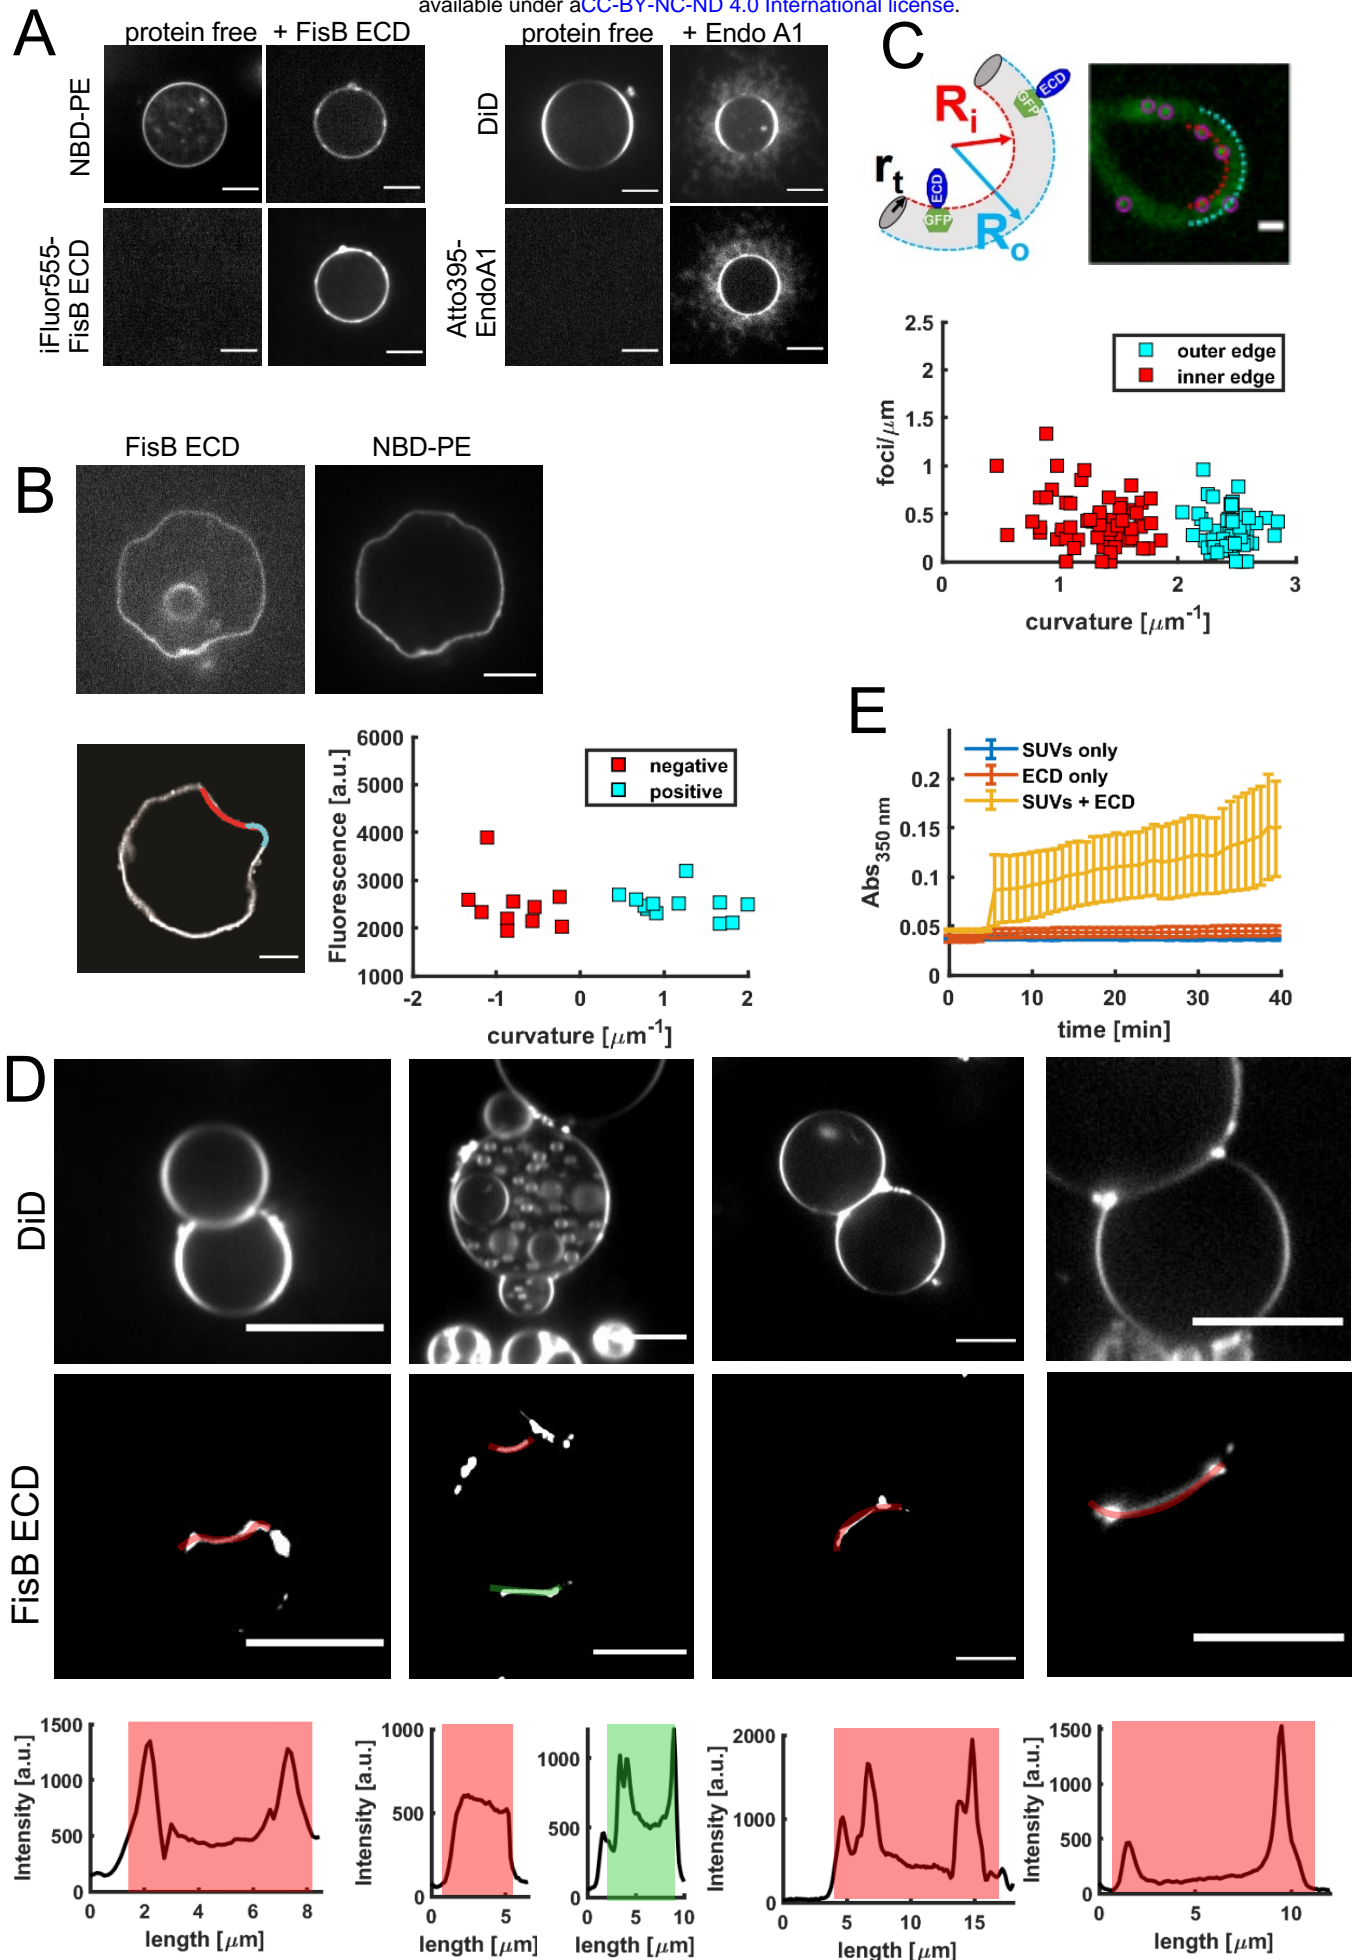

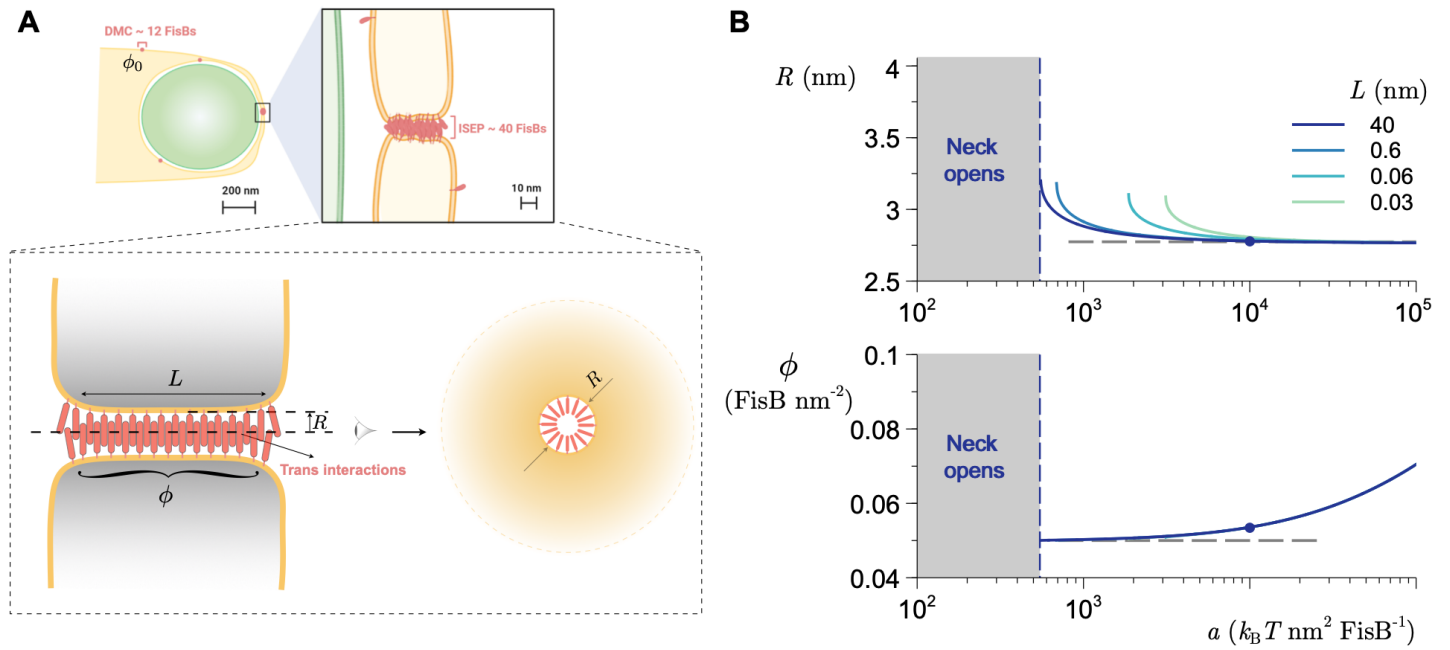

**FIGURE 9**
